# Supplementary material for: CTNNBL1 facilitates the association of CWC15 with CDC5L and is required to maintain the abundance of the Prp19 spliceosomal complex
Source: PubMed Central journal article supplement (PMC4538830; doi:10.1093/nar/gkv643), 2015-06-29

# CTNNBL1 facilitates the association of CWC15 with CDC5L and is required to maintain the abundance of the Prp19 spliceosomal complex

Febe van Maldegem<sup>1\*§</sup>, Sarah Maslen<sup>1</sup>, Christopher M Johnson<sup>1</sup>, Anita Chandra<sup>1</sup> Karuna Ganesh<sup>2</sup>, Mark Skehel<sup>1</sup> and Cristina Rada<sup>1\*</sup>

## SUPPLEMENTARY DATA

### Supplementary Methods

*Expression vectors.* Plasmids with CTNNBL1 and its mutants have been described previously (1, 2). Full length and truncated versions of CWC15 and CDC5L were PCR amplified and cloned using the primers and enzymes listed in Table S1. pOPTM was a kind gift of Dr. O. Perisic, Cambridge.

*Protein crosslinking.* After purification, 10 mM of each protein was mixed in crosslinking buffer (see buffer list), crosslinking was initiated by addition of a mix of BS3-d0 and BS3-d4 (Bis(sulfosuccinimidyl) suberate deuterated and non-deuterated crosslinking reagent mix, BS3-d4/d0 -with a spacer arm of 11.4 Å) up to 0.5 mM, and terminated with a final concentration of 50 mM Tris pH7.5 after 0, 15 and 30 min. Complexes were separated by SDS-PAGE and gel bands were cut out and digested with trypsin. The resulting peptides were analysed by nano-scale capillary LC-MS/MS using an Ultimate U3000 UPLC (ThermoScientific Dionex) to deliver a flow of approximately 300 nL/min. A C18 Acclaim PepMap100 5 µm, 100 µm x 20 mm nanoViper trapped the peptides prior to separation on a C18 Acclaim PepMap100 3 µm, 75 µm x 250 mm nanoViper (both from ThermoScientific Dionex). Peptides were eluted with a gradient of acetonitrile. The analytical column outlet was directly interfaced with a LTQ-Velos Orbitrap mass spectrometer (ThermoScientific) operated in DDA (Data Dependent Acquisition) mode, where an initial MS scan is followed by fragmentation of the top 10 ions. The resulting data were analysed using Hekate cross-linking software (3) and all potential cross-links were manually validated.

*Hydrogen deuterium exchange mass spectrometry (HDX-MS).* Proteins were dialysed against exchange buffer but with MPW instead of D<sub>2</sub>O (see buffer table) and then diluted as single proteins or combined ([CWC15 + CDC5L], [CWC15 + CTNNBL1] or [CWC15 + CDC5L + CTNNBL1]) to 1 mg/ml for His-CTNNBL1 and 0.5 mg/ml for CWC15 and CDC5L in a volume of 10 µl. The protein solutions were mixed with 40 µl of exchange buffer (with D<sub>2</sub>O) for 3 seconds on ice and 3, 30, 300 and 3000 seconds at room temperature (22°C) before quenching by the addition of 20 µl ice cold quench buffer (buffer list) and snap freezing in liquid nitrogen. Each time point and protein combination was done in triplicate.

The quenched protein samples were rapidly thawed and subjected to proteolytic cleavage by pepsin followed by reversed phase HPLC separation essentially as previously described (4). The

protein was passed through an immobilized pepsin column, 2.1 x 30 mm (Porozyme, ABI) at 230  $\mu\text{l}/\text{min}$  for 3 min and the peptic peptides trapped and desalted on a 2.1 x 5 mm C18 trap column (Acuity BEH C18 Van-guard pre-column, 1.7  $\mu\text{m}$ , Waters). Trapped peptides were subsequently eluted over 12 min using a 5-36% gradient of acetonitrile in 0.1%v/v formic acid at 40  $\mu\text{l}/\text{min}$ . Peptides were separated on a reverse phase column (Acuity UPLC BEH C18 column 1.7  $\mu\text{m}$ , 100 mm x 1 mm (Waters). Peptides were detected on a Xevo G2 Q-TOF (Waters) acquiring over a mass range from 300 to 1400 m/z, with the standard electrospray ionization (ESI) source and lock mass calibration using [Glu1]-fibrino peptide B (500 fmol/ $\mu\text{l}$ ). The mass spectrometer was operated at a source temperature of 80°C, and a spray voltage of 2.6 kV. Spectra were collected in positive ion mode.

Peptide identification was performed by data dependent acquisition using a 3-35% gradient of acetonitrile in 0.1%v/v formic acid over 120 min with a Xevo G2 Q-TOF (Waters). This was supplemented with a shorter 20 min gradient separation to identify and correct the retention time for all peptide samples. The resulting MS/MS data was analysed using the Mascot database search engine (Matrix Science) using an MS tolerance of 5 ppm and a MS/MS tolerance of 0.15 Da. Mass analysis of the peptide centroids was performed as described previously, using the software HD-Examiner (Sierra Analytics) (4). Only peptides with a Mascot score >15 were considered. The first round of analysis and identification were performed automatically by the HD-Examiner software, however, all peptides (deuterated and non-deuterated) were manually verified at every state and time point for the correct charge state, m/z range, presence of overlapping peptides, and the expected retention time. Deuterium incorporation was not corrected for back-exchange and represents relative, rather than absolute changes in deuterium levels. Changes in H/D amide exchange in any peptide may be due to a single amide or a number of amides within that peptide. All time points in this study were prepared at the same time. Individual time points were acquired on the mass spectrometer on the same day.

## **Buffer list**

### **Triton lysis buffer**

20 mM Tris-Cl pH8, 125 mM NaCl, 1 mM  $\text{MgCl}_2$ , 10% glycerol

### **Bacterial protein expression and purification buffers**

Lysis Buffer: As wash buffer, but supplemented with: Lysozyme, 1 mg/ml (Sigma Aldrich), EDTA-free protease inhibitors (Roche) and Benzonase, 100 U/ml (Merck Millipore)

Wash Buffer for CTNNB1: 50 mM  $\text{Na}_2\text{HPO}_4/\text{NaH}_2\text{PO}_4$  pH7.4, 500 mM NaCl, 1 mM  $\text{MgCl}_2$ . Wash Buffer for CDC5L and CWC15: 50 mM Tris pH7.4, 150 mM NaCl, 5mM  $\text{MgCl}_2$ , 5 mM 2-Mercaptoethanol, 0.1% Triton X-100.

### **Ion exchange buffers:**

For CTNNB1: (Buffer A) 20 mM Tris pH8.0, 50 mM NaCl, 5 mM 2-Mercaptoethanol and (Buffer B) As buffer (A) but 1M NaCl

For CDC5L: (Buffer A) 50 mM Tris pH7.0, 150 mM NaCl, 5mM MgCl<sub>2</sub>, 5 mM 2-Mercaptoethanol and (Buffer B) As buffer (A) but 1M NaCl

For CWC15: (Buffer A) 50 mM Tris pH8.0, 150 mM NaCl, 5mM MgCl<sub>2</sub>, 5 mM 2-Mercaptoethanol and (Buffer B) As buffer A, but 1M NaCl

#### **Pull down buffer**

20 mM Hepes pH8.0, 110 mM KAc, 2 mM MgAc, 20 mM Imidazole, 10% glycerol, 0.2% Tween 20, 5 mM 2-Mercaptoethanol

#### **Crosslinking buffer/SEC-MALS buffer**

20 mM Hepes pH8.0, 110 mM KAc, 1 mM DTT

#### **HDX - Exchange buffer**

10 mM Hepes pH8.0, 50 mM NaCl, 1 mM DTT, in 99% Deuterium

#### **3.5x HDX - Quench buffer**

2 M Guanidinium HCl, 2.6% formic acid in Millipore deionised water

## **REFERENCES**

1. Ganesh, K., Adam, S., Taylor, B., Simpson, P., Rada, C. and Neuberger, M. (2011) CTNNB1 is a novel nuclear localization sequence-binding protein that recognizes RNA-splicing factors CDC5L and Prp31. *J. Biol. Chem.*, **286**, 17091–17102.
2. Ganesh, K., van Maldegem, F., Telerman, S.B., Simpson, P., Johnson, C.M., Williams, R.L., Neuberger, M.S. and Rada, C. (2014) Structural and mutational analysis reveals that CTNNB1 binds NLSs in a manner distinct from that of its closest armadillo-relative, karyopherin  $\alpha$ . *FEBS Letters*, **588**, 21–27.
3. Holding, A.N., Lamers, M.H., Stephens, E. and Skehel, J.M. (2013) Hekate: software suite for the mass spectrometric analysis and three-dimensional visualization of cross-linked protein samples. *J. Proteome Res.*, **12**, 5923–5933.
4. Burke, J.E., Vadas, O., Berndt, A., Finegan, T., Perisic, O. and Williams, R.L. (2011) Dynamics of the phosphoinositide 3-kinase p110 $\delta$  interaction with p85 $\alpha$  and membranes reveals aspects of regulation distinct from p110 $\alpha$ . *Structure*, **19**, 1127–1137.
5. Peng, K., Radivojac, P., Vucetic, S., Dunker, A.K. and Obradovic, Z. (2006) Length-dependent prediction of protein intrinsic disorder. *BMC Bioinformatics*, **7**, 208.
6. Obradovic, Z., Peng, K., Vucetic, S., Radivojac, P. and Dunker, A.K. (2005) Exploiting heterogeneous sequence properties improves prediction of protein disorder. *Proteins*, **61 Suppl 7**, 176–182.
7. Romero, P., Obradovic, Z., Li, X., Garner, E.C., Brown, C.J. and Dunker, A.K. (2001) Sequence complexity of disordered protein. *Proteins*, **42**, 38–48.

## Supplementary Tables

**Table S1.**

List of plasmids and primers used.

| Primer           | Construct name/Primer sequence                    | Vector                    | Enzyme |
|------------------|---------------------------------------------------|---------------------------|--------|
|                  | HA-CWC15<br>GST-CWC15                             | pcDNA3.1-3HA<br>pGEX-6P-1 |        |
| CWC15[1-229]_fw  | ATAT-GGATCC-ATGACAACAGCAGCCAGGC                   |                           | BamHI  |
| CWC15[1-229]_rev | ATAT-GAATTC-<br>CTATTTAATATATTTCTCCATGAACTTTTTGTG |                           | EcoRI  |
|                  | HA-CWC15[1-79]<br>GST-CWC15[1-79]                 | pcDNA3.1-3HA<br>pGEX-6P-1 |        |
| CWC15[1-229]_fw  | ATAT-GAATTC-<br>CTATTTAATATATTTCTCCATGAACTTTTTGTG |                           | BamHI  |
| CWC15[1-79]_rev  | ATAT-GAATTC-<br>CTATGGACGATCCCTATTTTTCTCTC        |                           | EcoRI  |
|                  | HA-CWC15[80-229]<br>GST-CWC15[80-229]             | pcDNA3.1-3HA<br>pGEX-6P-1 |        |
| CWC15[80-229]_fw | ATAT-GGATCC-ACCCGAGAACATACAACCTCC                 |                           | BamHI  |
| CWC15[1-229]_rev | ATAT-GAATTC-<br>CTATTTAATATATTTCTCCATGAACTTTTTGTG |                           | EcoRI  |
|                  | MBP-CDC5L[1-500]                                  | pOPTM                     |        |
| CDC5L[1-500]_fw  | AAT-CATATG-CCTCGAATTATGATCAAG                     |                           | NdeI   |
| CDC5L[1-500]_rev | AAT-ACGCGT-TCAGAATTTTGACTTTAAAGTCTC               |                           | MluI   |
|                  | MBP-CDC5L[1-271]                                  | pOPTM                     |        |
| CDC5L[1-500]_fw  | AAT-CATATG-CCTCGAATTATGATCAAG                     |                           | NdeI   |
| CDC5L[1-271]_rev | AAT-ACGCGT-<br>TCAGAATAGCTGATGGTAAATCAG           |                           | MluI   |
|                  | MBP-CDC5L[1-195]                                  | pOPTM                     |        |
| CDC5L[1-500]_fw  | AAT-CATATG-CCTCGAATTATGATCAAG                     |                           | NdeI   |
| CDC5L[1-195]_rev | AAT-ACGCGT-TCAGCCAGCTGCTCGAAGTTCTC                |                           | MluI   |
|                  | MBP-CDC5L[1-165]                                  | pOPTM                     |        |
| CDC5L[1-500]_fw  | AAT-CATATG-CCTCGAATTATGATCAAG                     |                           | NdeI   |

|                  |                                          |  |      |
|------------------|------------------------------------------|--|------|
| CDC5L[1-165]_rev | AAT-ACGCGT-<br>TCACTTCTTTCCCTGAGTATTAGCC |  | MluI |
|------------------|------------------------------------------|--|------|

**Table S2.**

List of primers used for quantitative PCR.

| Primer                        | Primer sequence                                                      |                                |
|-------------------------------|----------------------------------------------------------------------|--------------------------------|
| CDC5L<br>_fw<br>_rev          | CCAGTGCTTGGAACTATGAG<br>CATCCATGTCTATCGGGTCA                         | exon 3<br>exon 5               |
| B2M<br>_fw<br>_rev            | GTCGCGGTCGCTTCAGTCGT<br>TCCGGTGGGTGGCGTGAGTA                         | exon 1<br>exon 2               |
| ACTB<br>_fw<br>_rev1<br>_rev2 | CTGTGAGTCGCGTCCACCC<br>ACATGCCGGAGCCGTTGTCG<br>CACCCGCCCATGGTGTCCG   | exon 1<br>exon 2<br>intron 1-2 |
| CDK4<br>_fw<br>_rev1<br>_rev2 | CACCTCCAGAGCTCTTAGCC<br>GATCTCGGGCTTTGTACACC<br>TCCAAAATCACACCCTTGC  | exon 1<br>exon 2<br>intron 1-2 |
| MYC<br>_fw<br>_rev1<br>_rev2  | CTCCTCGAGCTGTTTGAAGG<br>AATAGGGCTGTACGGAGTCG<br>TGTCAAAAGCACAGGAATGG | exon 1<br>exon 2<br>intron 1-2 |

**Table S3**

Species nomenclature for components of the mammalian Prp19 complex and spliceosome proteins referred to in the text. The known protein homologues in yeast are included for reference.

|         | <i>Homo Sapiens</i>  | <i>Mus Musculus</i>   | <i>Schizosaccharomyce<br/>s pombe</i> | <i>Saccharomyces<br/>cerevisiae</i> |
|---------|----------------------|-----------------------|---------------------------------------|-------------------------------------|
| CTNNBL1 | CTNNBL1              | CTNNBL1 <sup>EL</sup> | SPAC1952.06c <sup>NE</sup>            | not present                         |
| CWC15   | CWC15/AD002          | CWC15                 | Cwf15/<br>SPBC337.06c*                | CWC15/<br>YDR163W <sup>NE</sup>     |
| CDC5L   | CDC5L                | CDC5L                 | Cdc5/<br>SPAC644.12*                  | CEF1/NTC85/<br>YMR213W*             |
| PRPF19  | PRPF19/PSO4/<br>SNEV | PRPF19 <sup>EL</sup>  | Prp19/Cwf8/<br>SPAC29A4.08c*          | PRP19/PSO4/<br>YLL036C*             |
| PLRG1   | PLRG1/PLR1           | PLRG1 <sup>EL</sup>   | Prp5/Cwf1/                            | PRP46/NTC50                         |

|       |                             |             |                              |                                        |
|-------|-----------------------------|-------------|------------------------------|----------------------------------------|
|       |                             |             | SPBP22H7.07*                 | YPL151C*                               |
| SPF27 | SPF27/BCAS2/<br>DAM1        | SPF27/BCAS2 | Cwf7/Spf27/<br>SPBC28F2.04c* | SNT309/NTC25/<br>YPR101W <sup>NE</sup> |
| PRPF8 | PRPF8/RP13/p2<br>20         | PRPF8/DBF3  | Spp42/Cwf6/<br>SPAC4F8.12c*  | PRP8/USA2/<br>YHR165C*                 |
| HSP7C | HSP7C/HSC70/<br>HSPA8/HSP73 | HSP7C/HSPA8 | multiple homologues          | multiple<br>homologues                 |

Official nomenclature is indicated first. \* Known essential and <sup>NE</sup> known non-essential proteins. <sup>EL</sup> indicates reported mouse embryonic lethality

## Supplementary Figure Legends

Figure S1. Mutants of CTNNBL1 retain their interaction with N-terminal portion of CDC5L.

CDC5L[1-195] MBP fusion purified on amylose resin in the presence of wild type or mutant His-CTNNBL1[77-563] (as described in Ganesh, et al. 2014) separated by SDS-PAGE. WT, CTNNBL1[77-563]; mutant 1 [77-520], mutant 2 [D153A, N154A, T155A, D156A], mutant 3 [L321A, M322A, H359A, I362A], mutant 4 [D170A, D172A], mutant 5 [H216A, N217A], mutant 6 [Q166A], mutant 7 [E223A, N224A, Y261A], mutant 8 [E264A, I268A], mutant 9 [D315A, S319A, H359A], WT, GST control. Asterisks indicate bait of pull downs. Input proteins (lower panel) and size markers (kDa) are shown.

Figure S2. The NLS3 peptide of CDC5L is not sufficient to bind CWC15.

Pull down of recombinant human CWC15[80-229] (lanes 1 and 3) or His-CTNNBL1[77-563] (lanes 2 and 4) by GST-NLS3 (lane 1-2) or GST only as a control (lane 3-4) on glutathione sepharose 4B beads. Asterisks indicate bait of the pull down assays. Input proteins (lower panel) and size markers (kDa) are indicated.

Figure S3. Inter-protein crosslinks of CTNNBL1, CDC5L and CWC15 complexes in solution.

Mobility of protein complexes separated by SDS-PAGE after crosslinking with Bis(sulfosuccinimidyl) suberate deuterated and non-deuterated crosslinking reagent mix (BS3-d4/d0) for the indicated times. The human recombinant proteins used as input are indicated on the top, while the resulting complexes are denoted on the right of each panel. Size markers (kDa) are indicated. Cross-links for: A) each protein on its own; B) a 1 to 1 molar mix of two of the proteins at a time and C) an equimolar mix of the three proteins. A faint band corresponding to the molecular weight of a dimer of the CDC5L fragment is indicated in panel A.

Figure S4. Chemical crosslinking identifies interaction sites between CTNNBL1, CDC5L and CWC15.

Graphical representation of the crosslinks found between A) recombinant human CTNNBL1 and CWC15, B) CTNNBL1 and CDC5L, and C) CWC15 and CDC5L. Crosslinks between peptides within the same protein are visualised with grey lines. Increased line width denotes the frequency in which the crosslink was detected. A surface model of CTNNBL1 is shown in gray with surface lysines coloured in yellow. Linear sequences of the CWC15[80-229] and CDC5L[1-195] fragments analysed are shown, with the aa numbering and the position of lysines indicated. Secondary structure predictions are shown, with helices and beta sheets marked with H and S in red and yellow blocks respectively. D) Coverage of the un-crosslinked peptides for each protein, with the frequency (y-axis) of each amino acid along the protein (aa) detected in the recovered peptides.

Figure. S5. Global hydrogen deuterium exchange levels over time of the different proteins and complexes in solution.

Exchange levels for peptides from A) His-CTNNBL1[77-563], B) CWC15[80-229], and C) CDC5L[1-195] alone or as part of the indicated complex. The residue start number (Start), residue end number (End), the charge state (CS), number of potential residues to be deuterated (#D), as well as the retention time (RT) are displayed for every peptide. The time points are labelled for the conditions tested. The relative level of HDX (%HDX, see SI methods) is coloured according to the gradient indicated. The data listed are the average of three independent experiments performed on the same day, with standard deviations (STDEVS) given in the columns on the right.

Figure. S6. Hydrogen deuterium exchanges over time in CTNNBL1 peptides.

Plots presenting the relative deuterium exchange (%HDX, see SI Methods) over time for CTNNBL1[77-563] peptides where the difference was considered significant. The blue curves represent the uncomplexed CTNNBL1, red are CTNNBL1 peptides from the complex of CWC15[80-229] and His-CTNNBL1[77-563], while the green curve is the exchange for the same peptides in the His-CTNNBL1[77-563]/CWC15[80-229]/CDC5L[1-195] complex. The surface model of CTNNBL1 shows the regions corresponding to the peptides. Individual colour represents non-overlapping peptides. Overlapping peptides are grouped and their position linked by the black lines

Figure S7. CTNNBL1 self-associates into a homo-trimer.

SEC-MALS analysis of full length recombinant human His-CTNNBL1[1-563] (red curve), His-CTNNBL[77-563] (green curve), His-CTNNBL[77-563] in 500 mM NaCl (black curve), and the His-CTNNBL[77-563] in complex CWC15[80-229] (blue curve), with excess CWC15 in the second smaller blue peak. Elution volume is depicted on the x-axis, the calculated molar mass in gram/mol on the left y-axis, and the refractive index in arbitrary units (a.u.) on the right y-axis.

Figure S8. CDC5L abundance is reduced but localisation is normal in CTNNBL1 deficient mouse cells.

A) Immunofluorescence for CDC5L and DAPI staining in 4% paraformaldehyde fixed *CD19-Cre Ctnnbl1<sup>+/-</sup>* controls (+/-) and *CD19-Cre Ctnnbl1<sup>-/-</sup>* resting B cells. The signal in the enlarged box showing a single nucleus has been linearly enhanced in the (-/-) pictures to allow visualisation of the characteristic speckled appearance. B) Two independent experiments show reduced levels of CDC5L and PRP19 protein in asynchronous control (+) and *Ctnnbl1* deficient (-) ES cell cultures, compared to  $\beta$ -tubulin. Size markers (kDa) are indicated.

Figure S9. Protein disorder predictions for full length human CWC15, CDC5L and CTNNBL1.

For each region of the protein (aa position) disorder disposition is indicated in the y-axis, with values above 0.5 predicting a disordered secondary protein structure and below structured regions as



predicted by three methods, VSL2b (5) (blue curve), VL3 (6)(red curve), VLXT (7) (grey curve)  
(<http://www.disprot.org/>).

Fig. S1

CTNNBL1 mutants

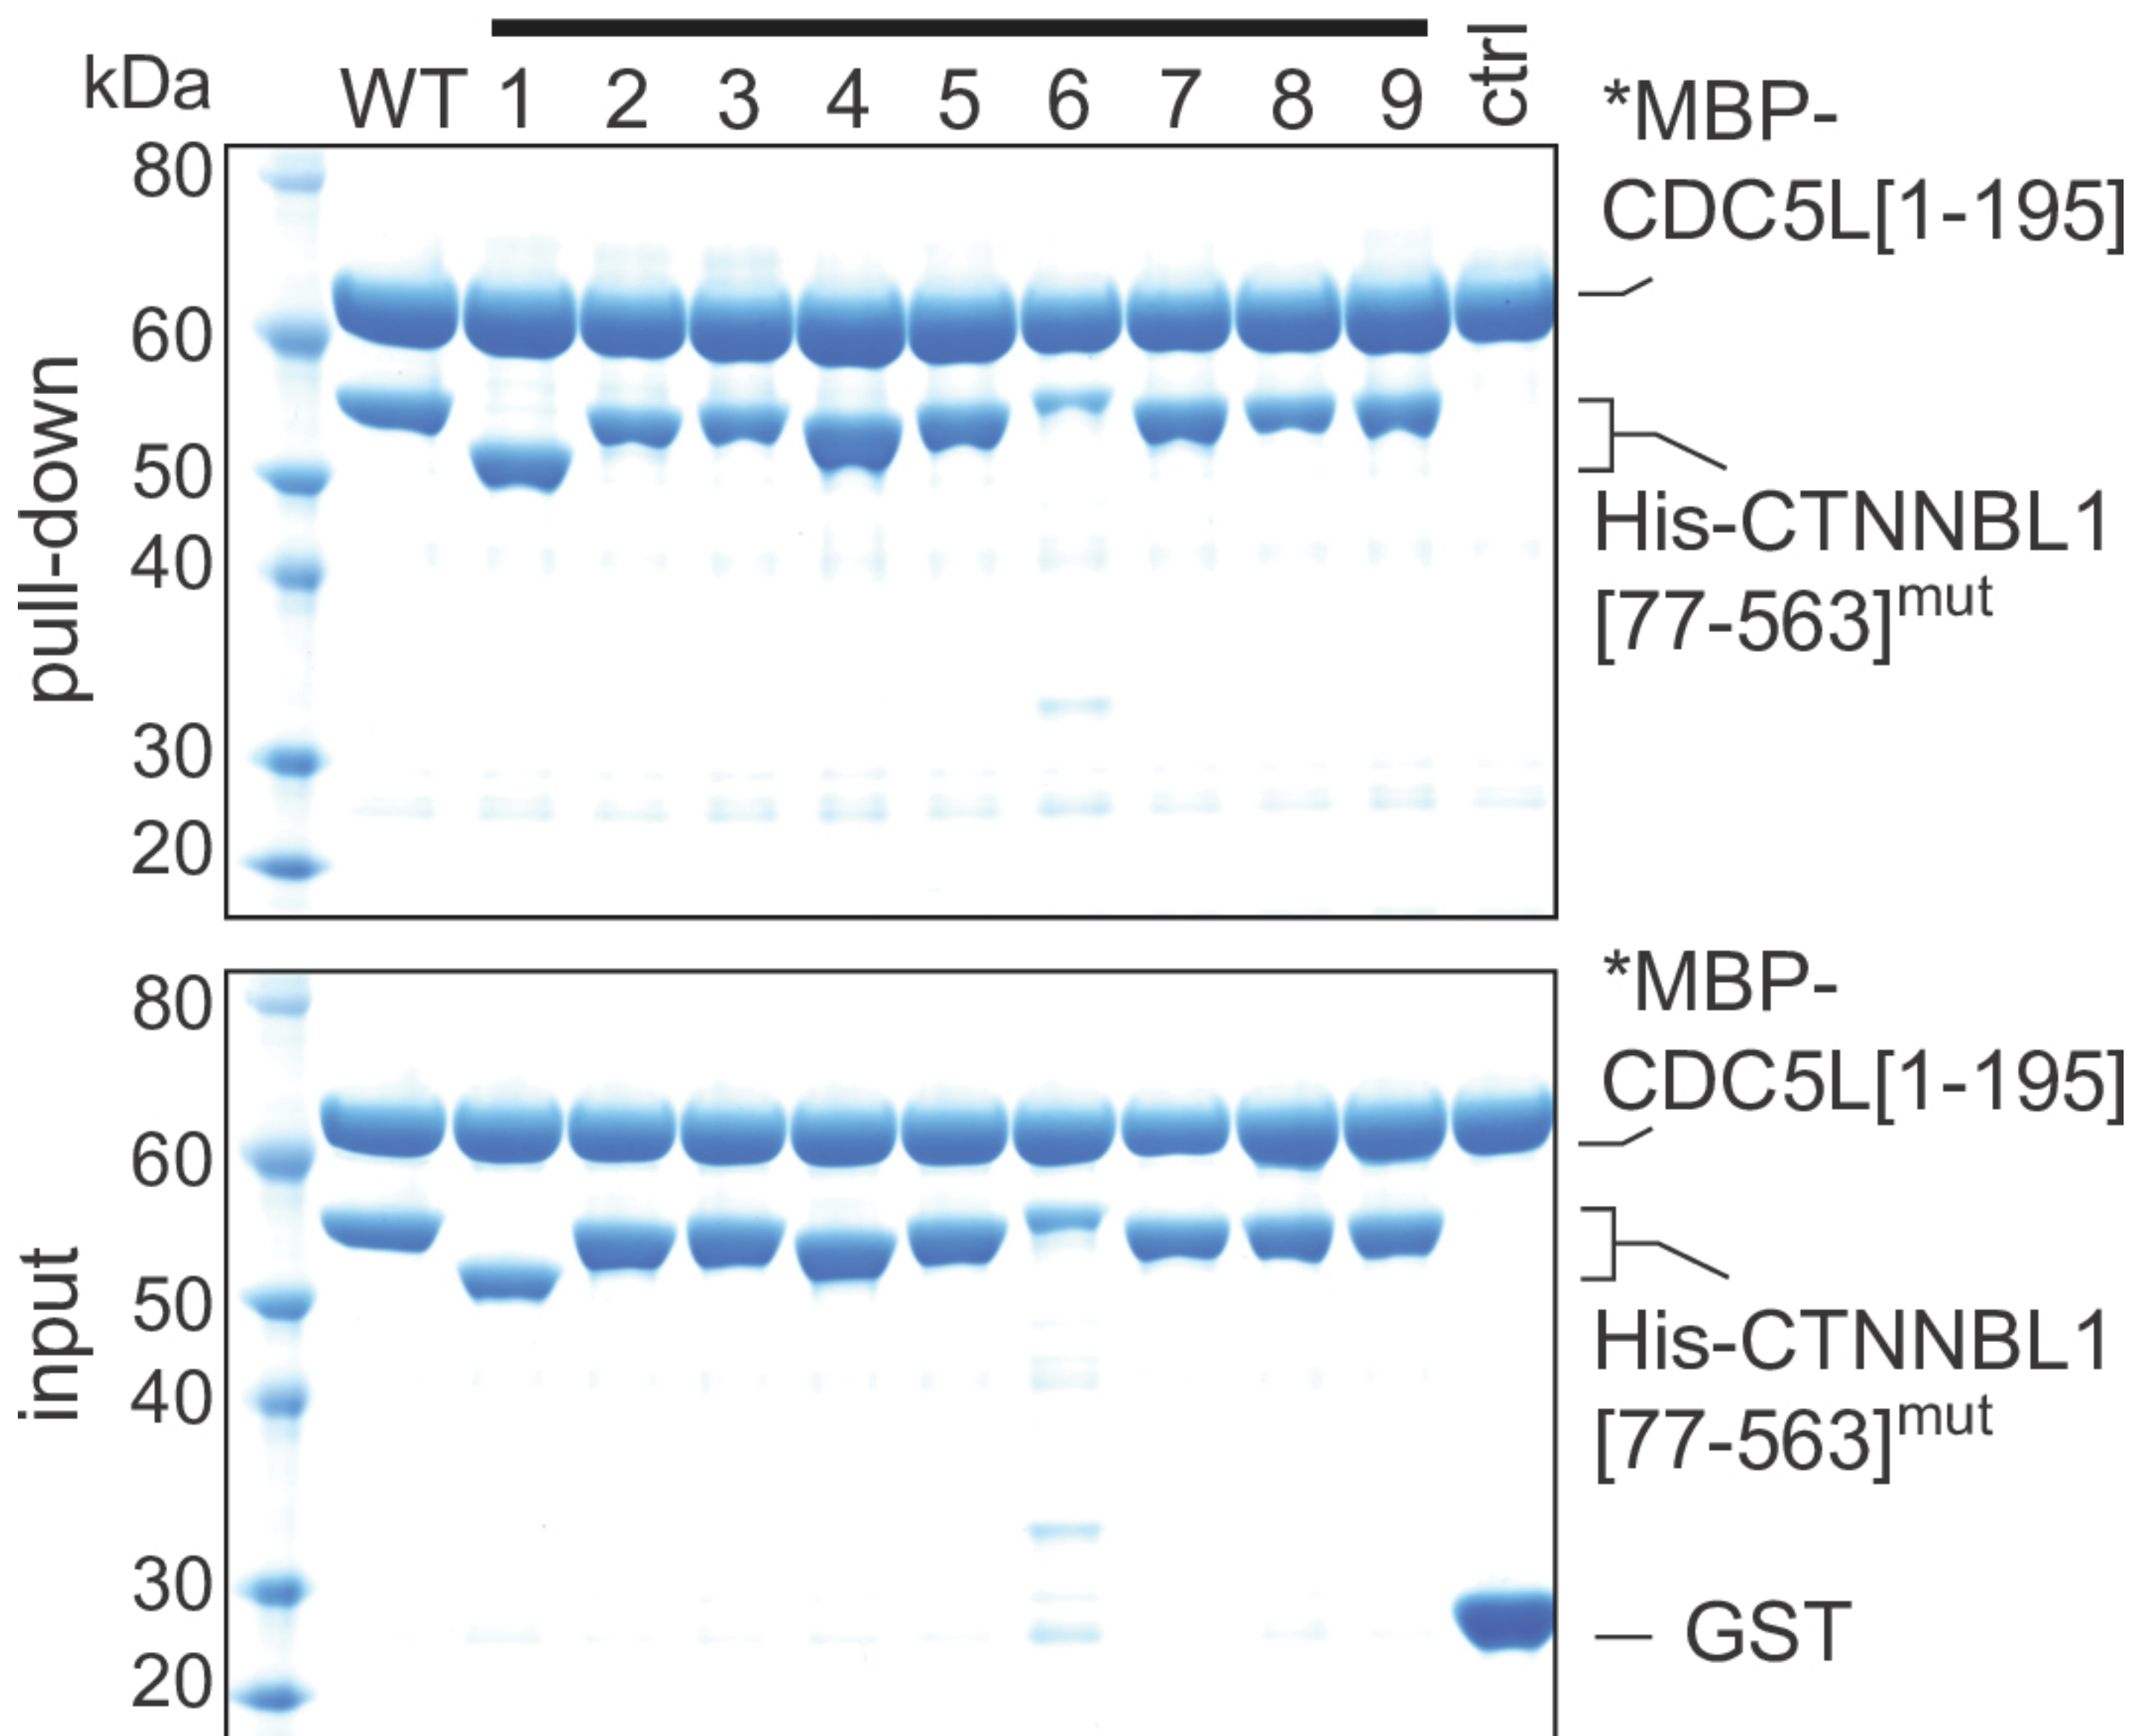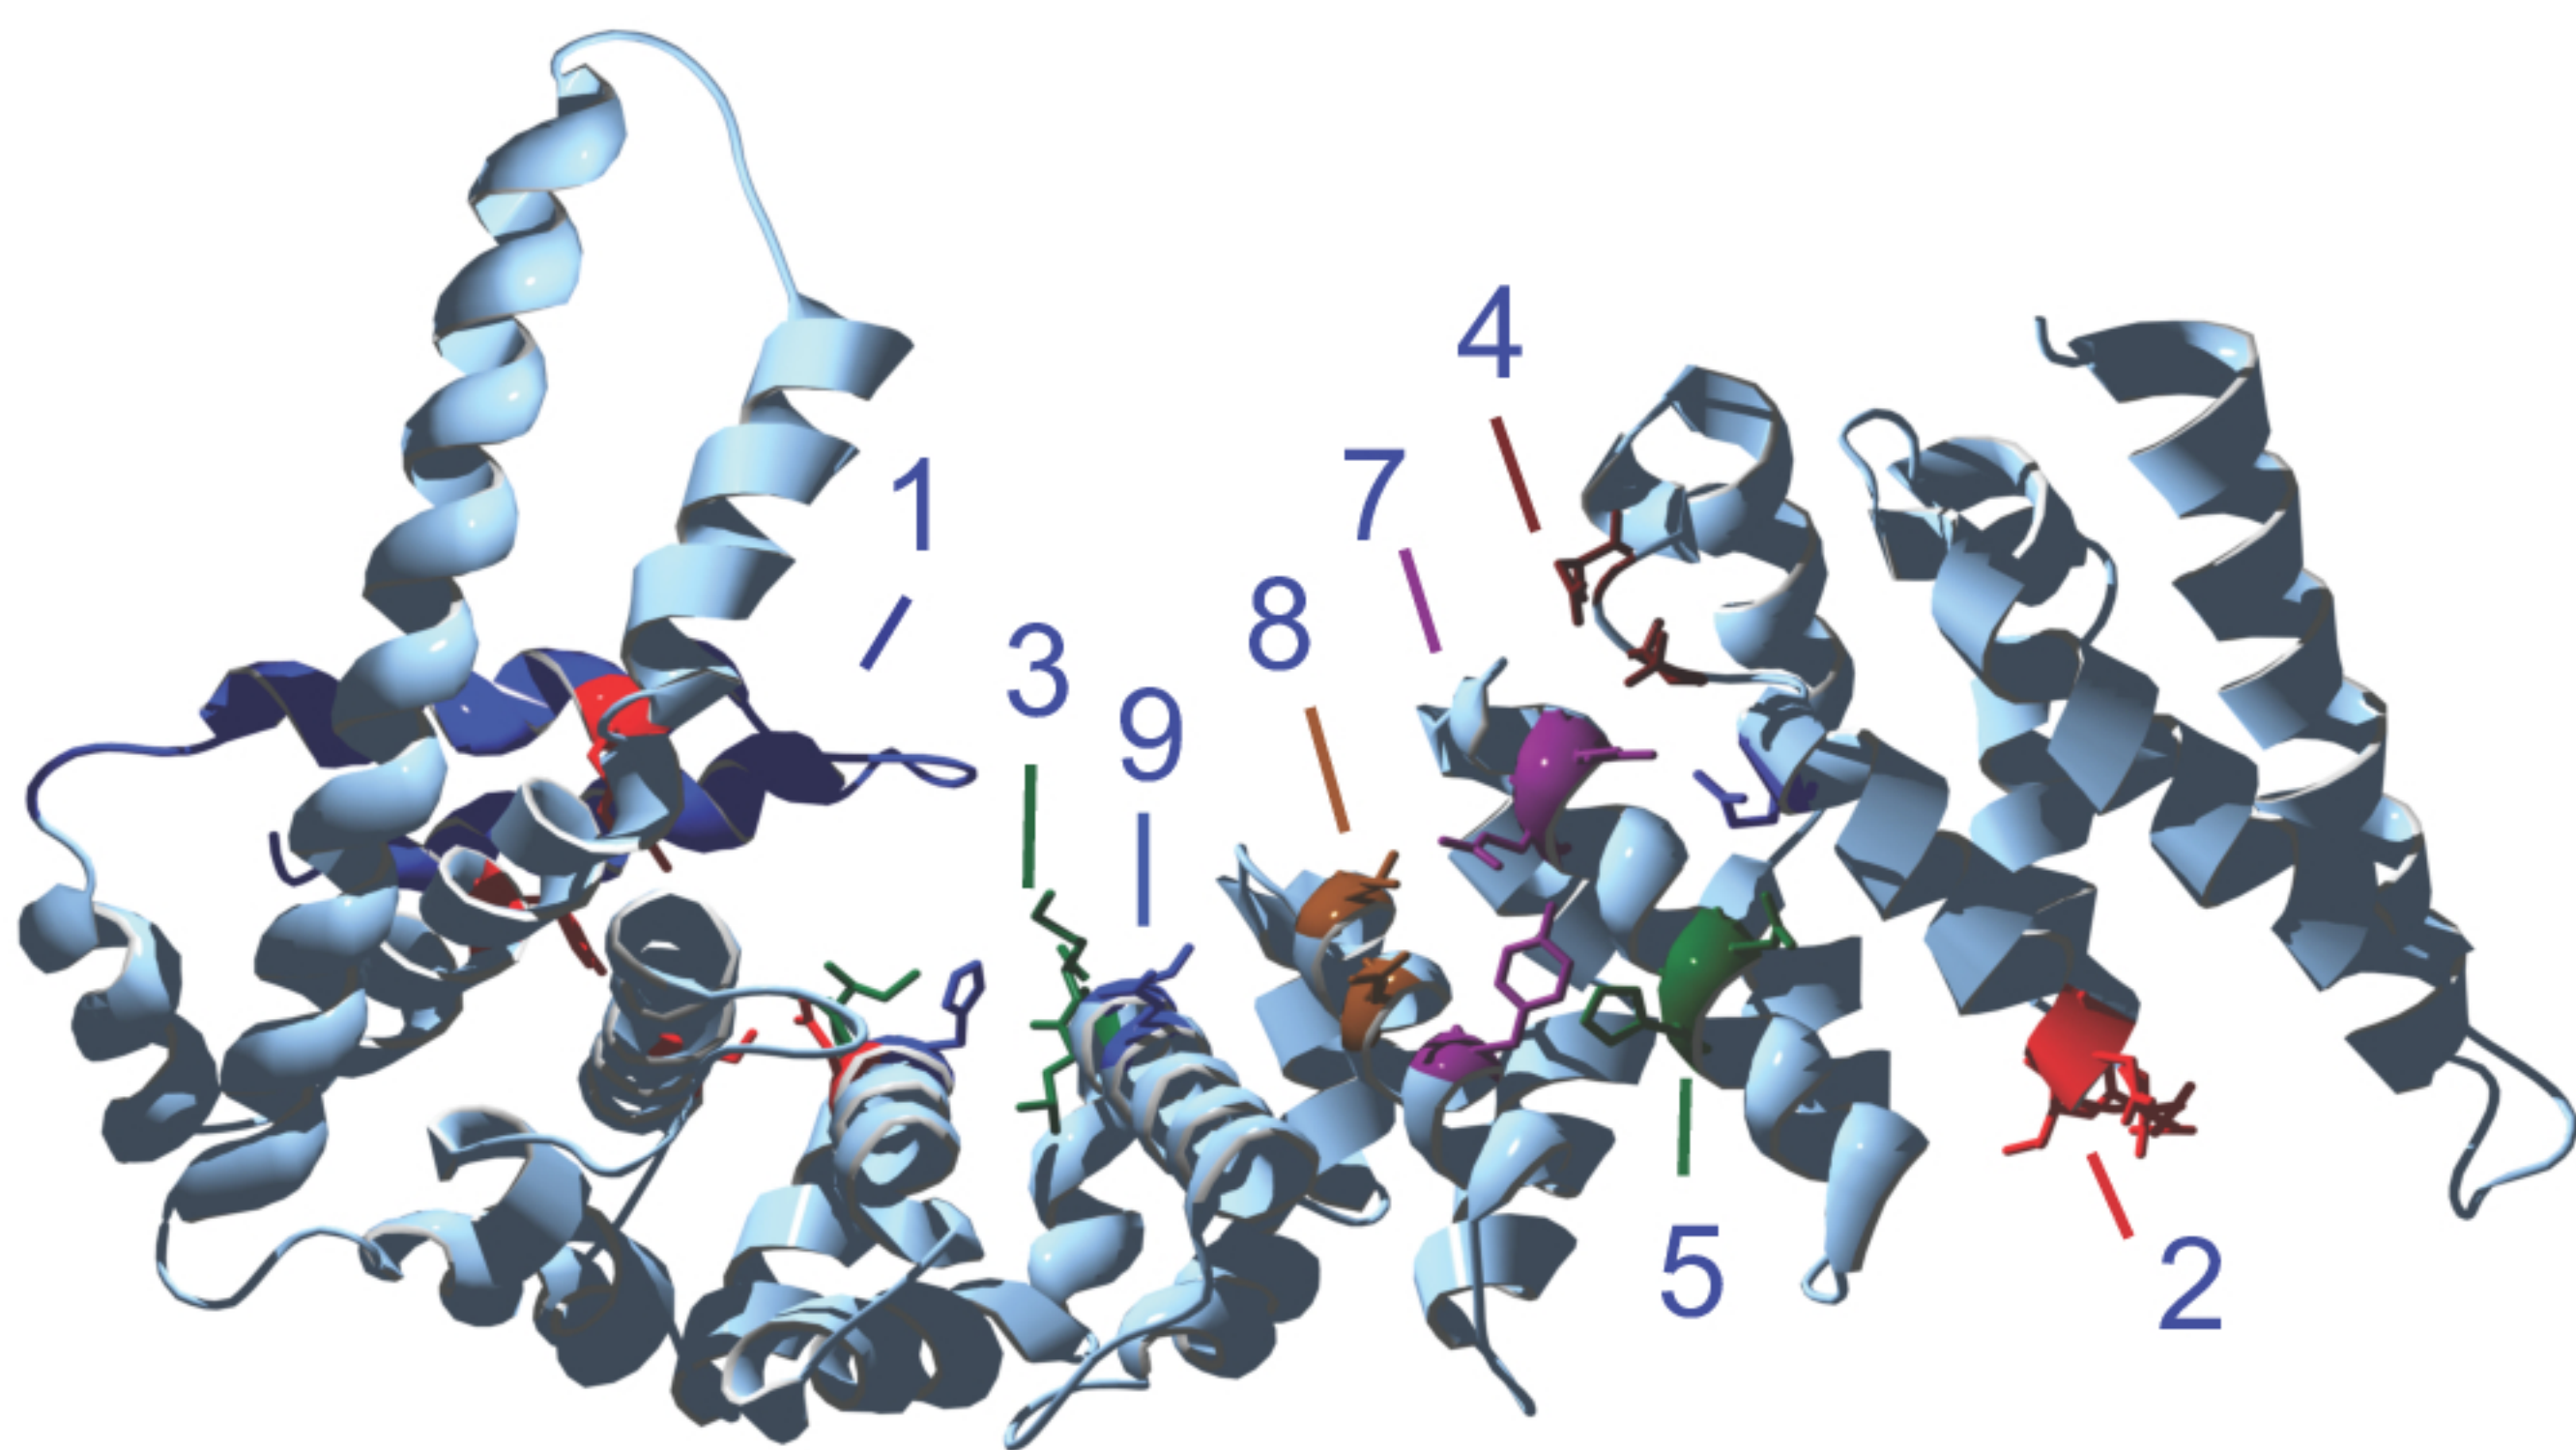

Fig. S2

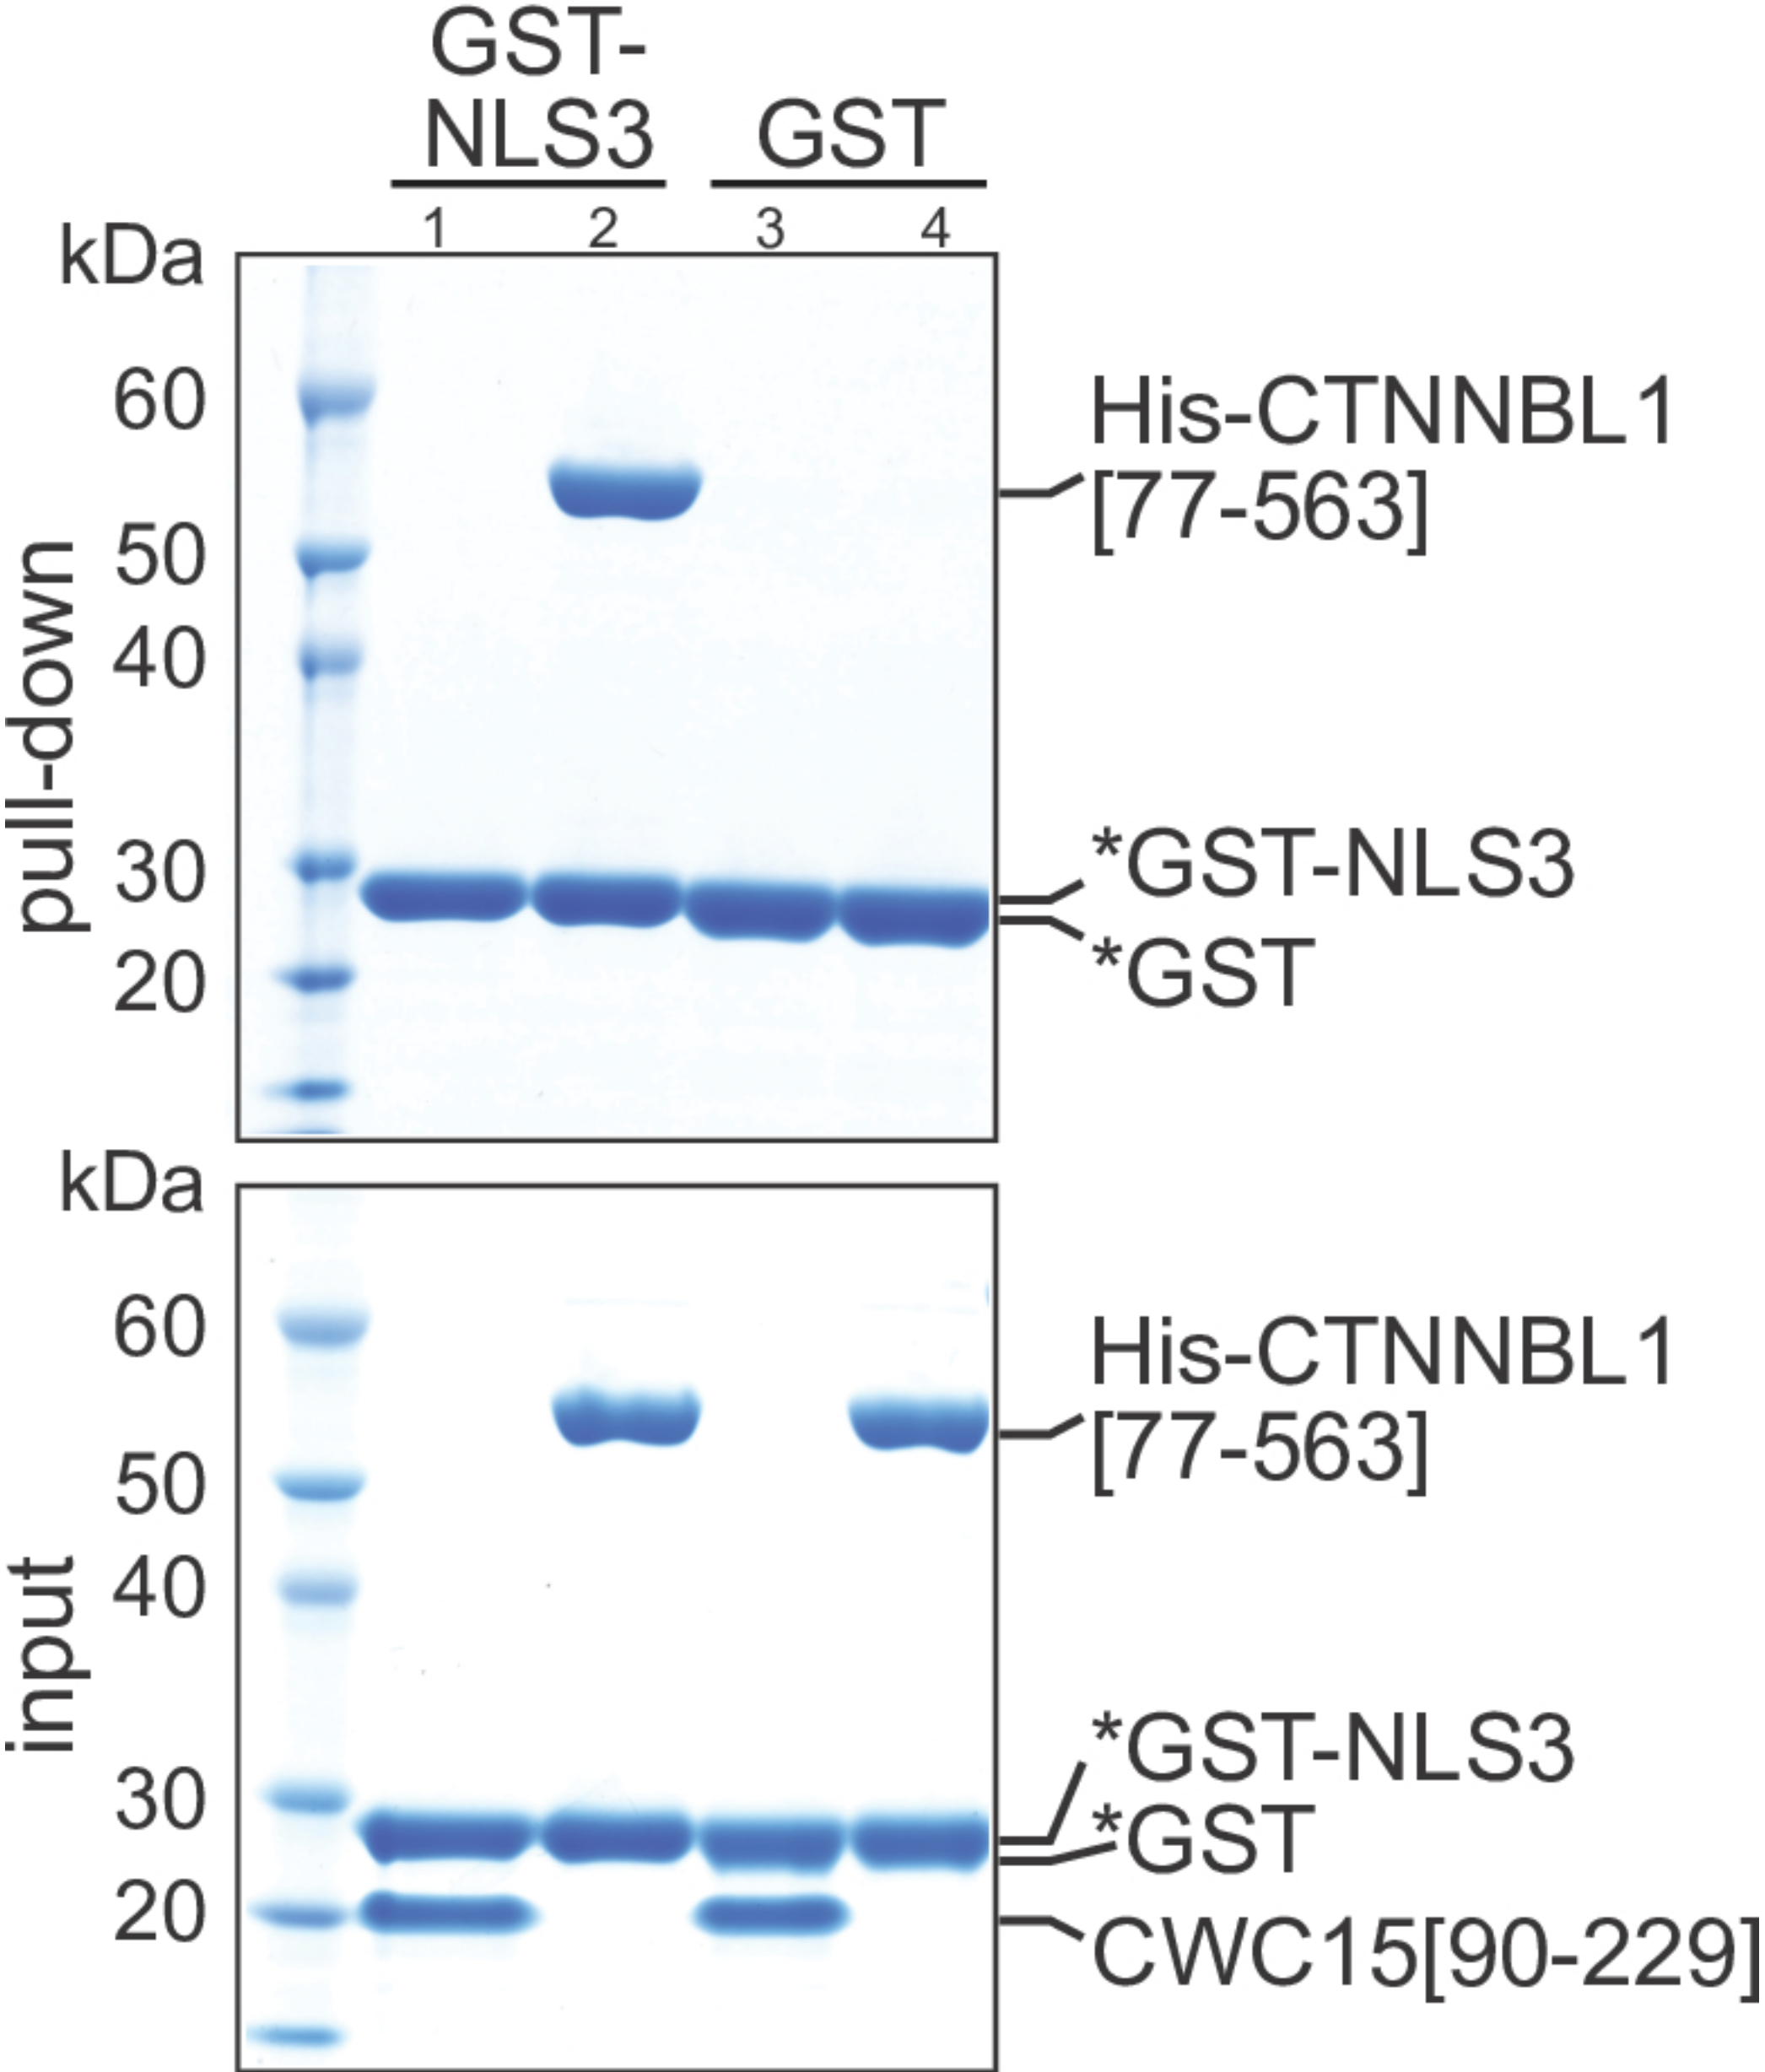



Fig. S3

A

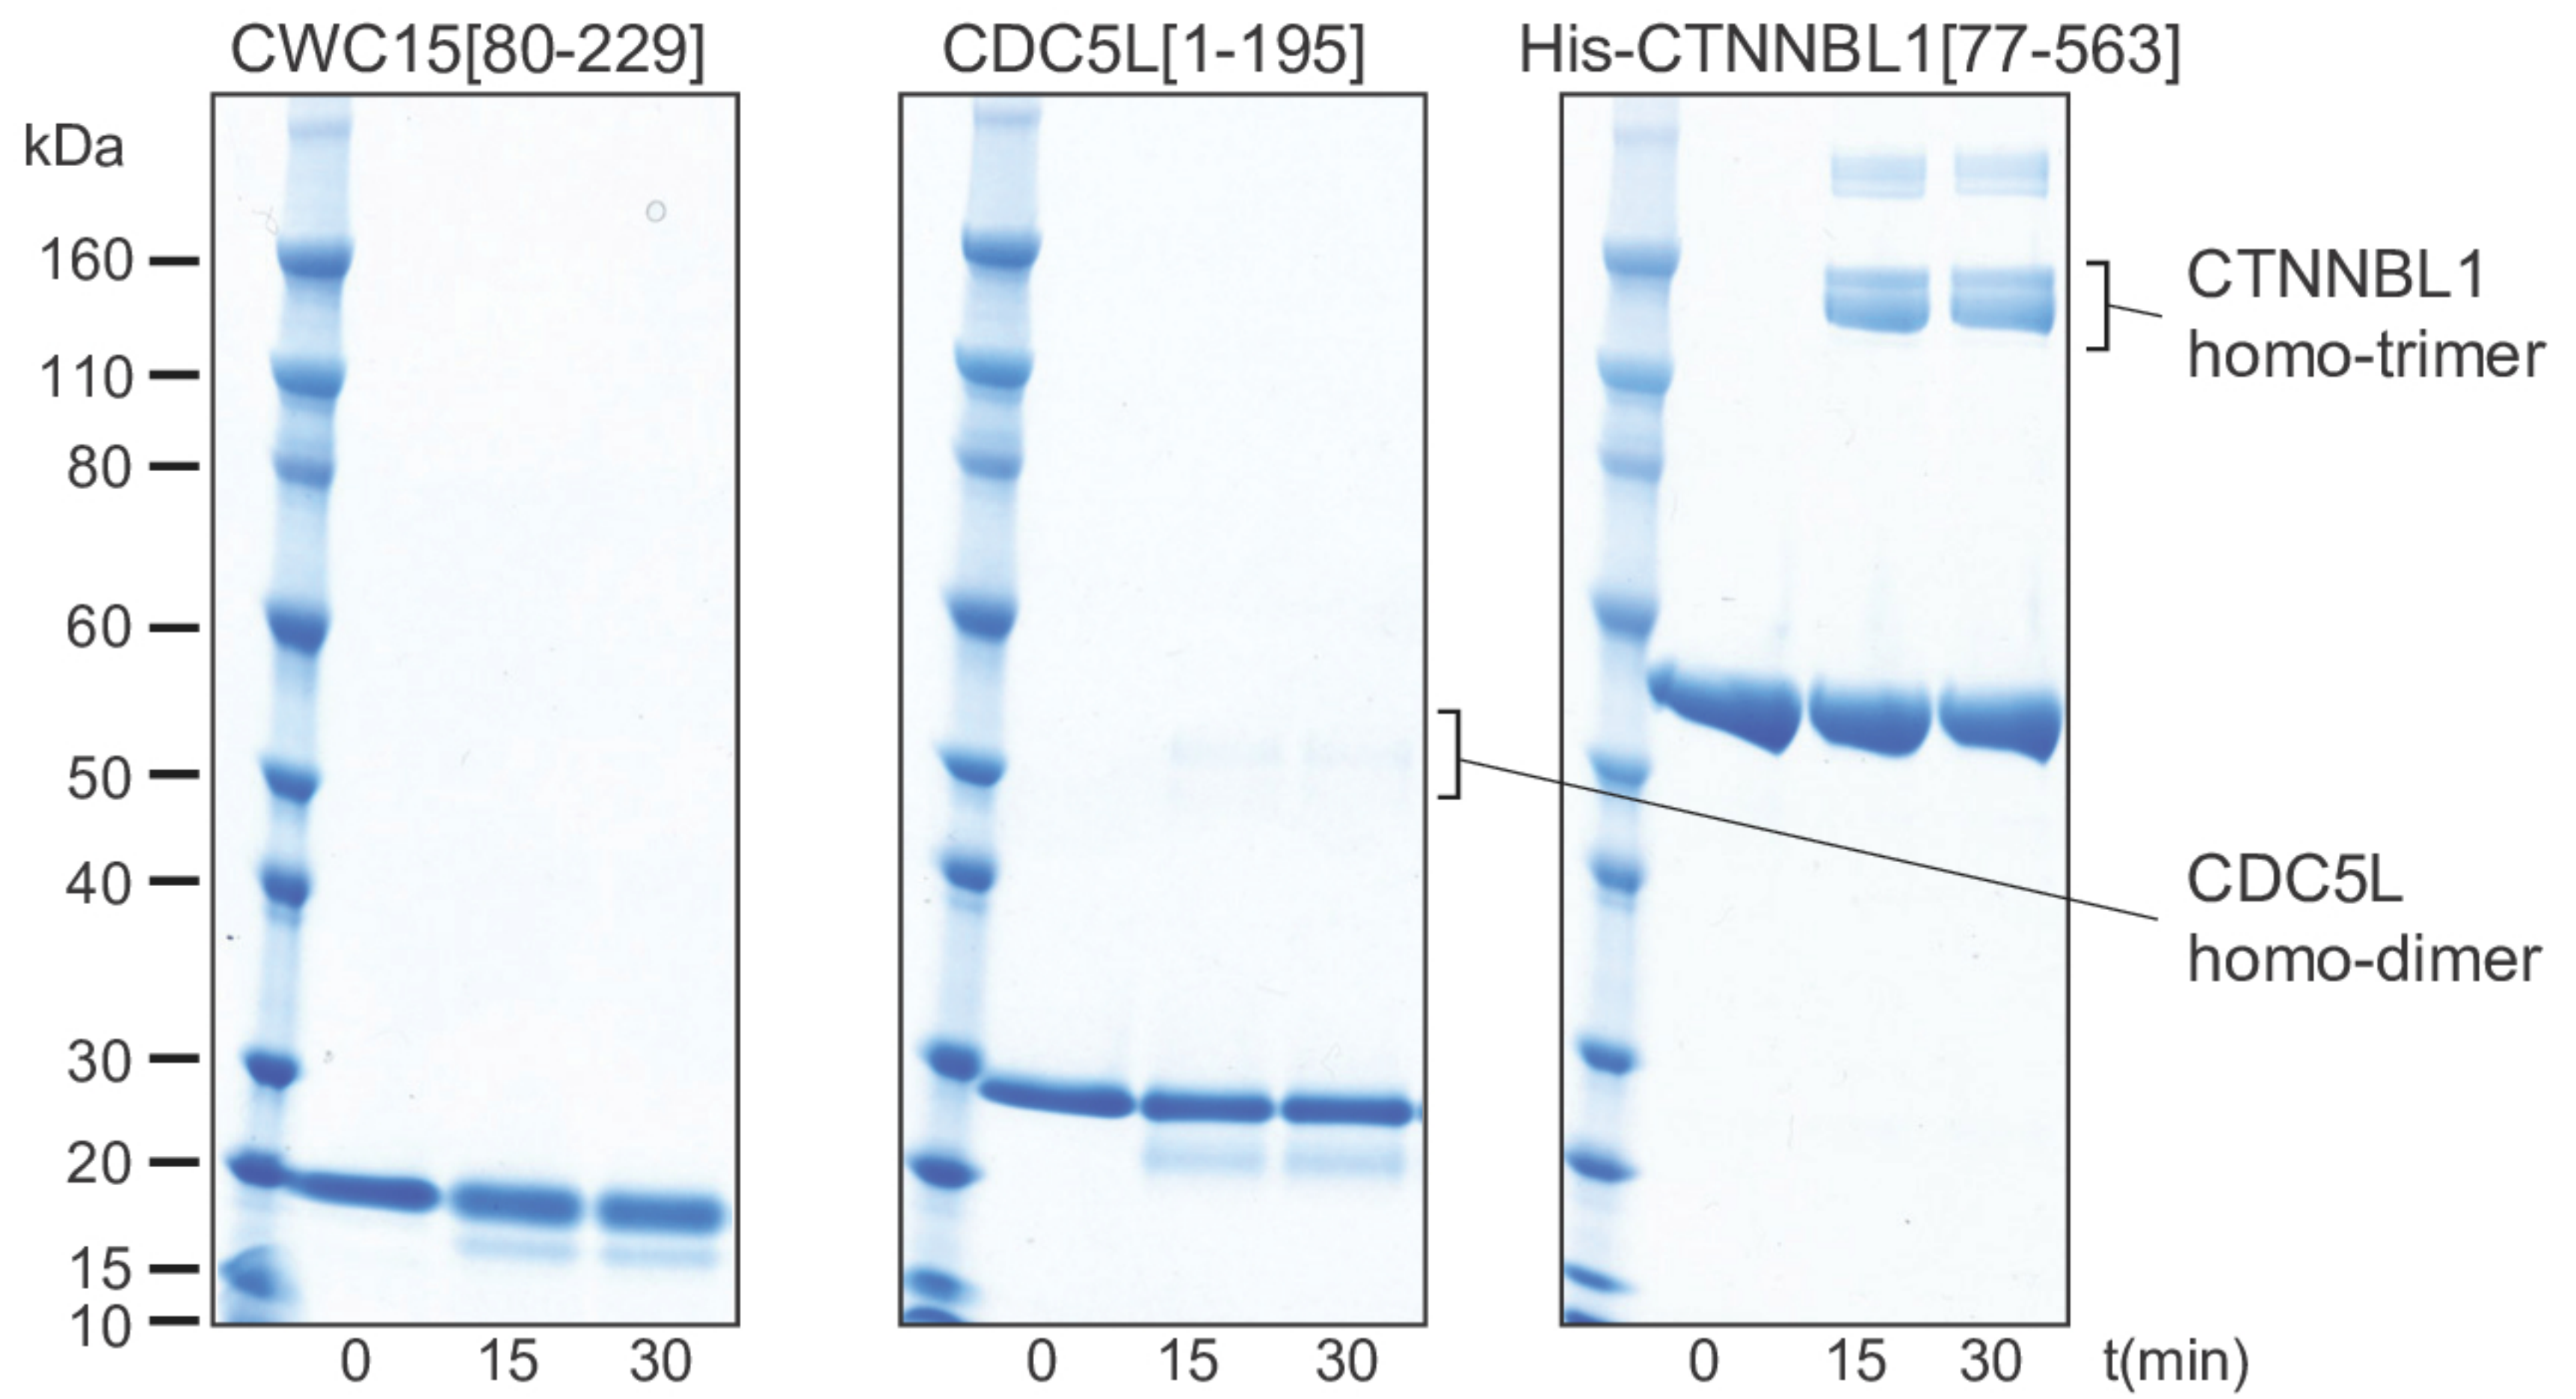

B

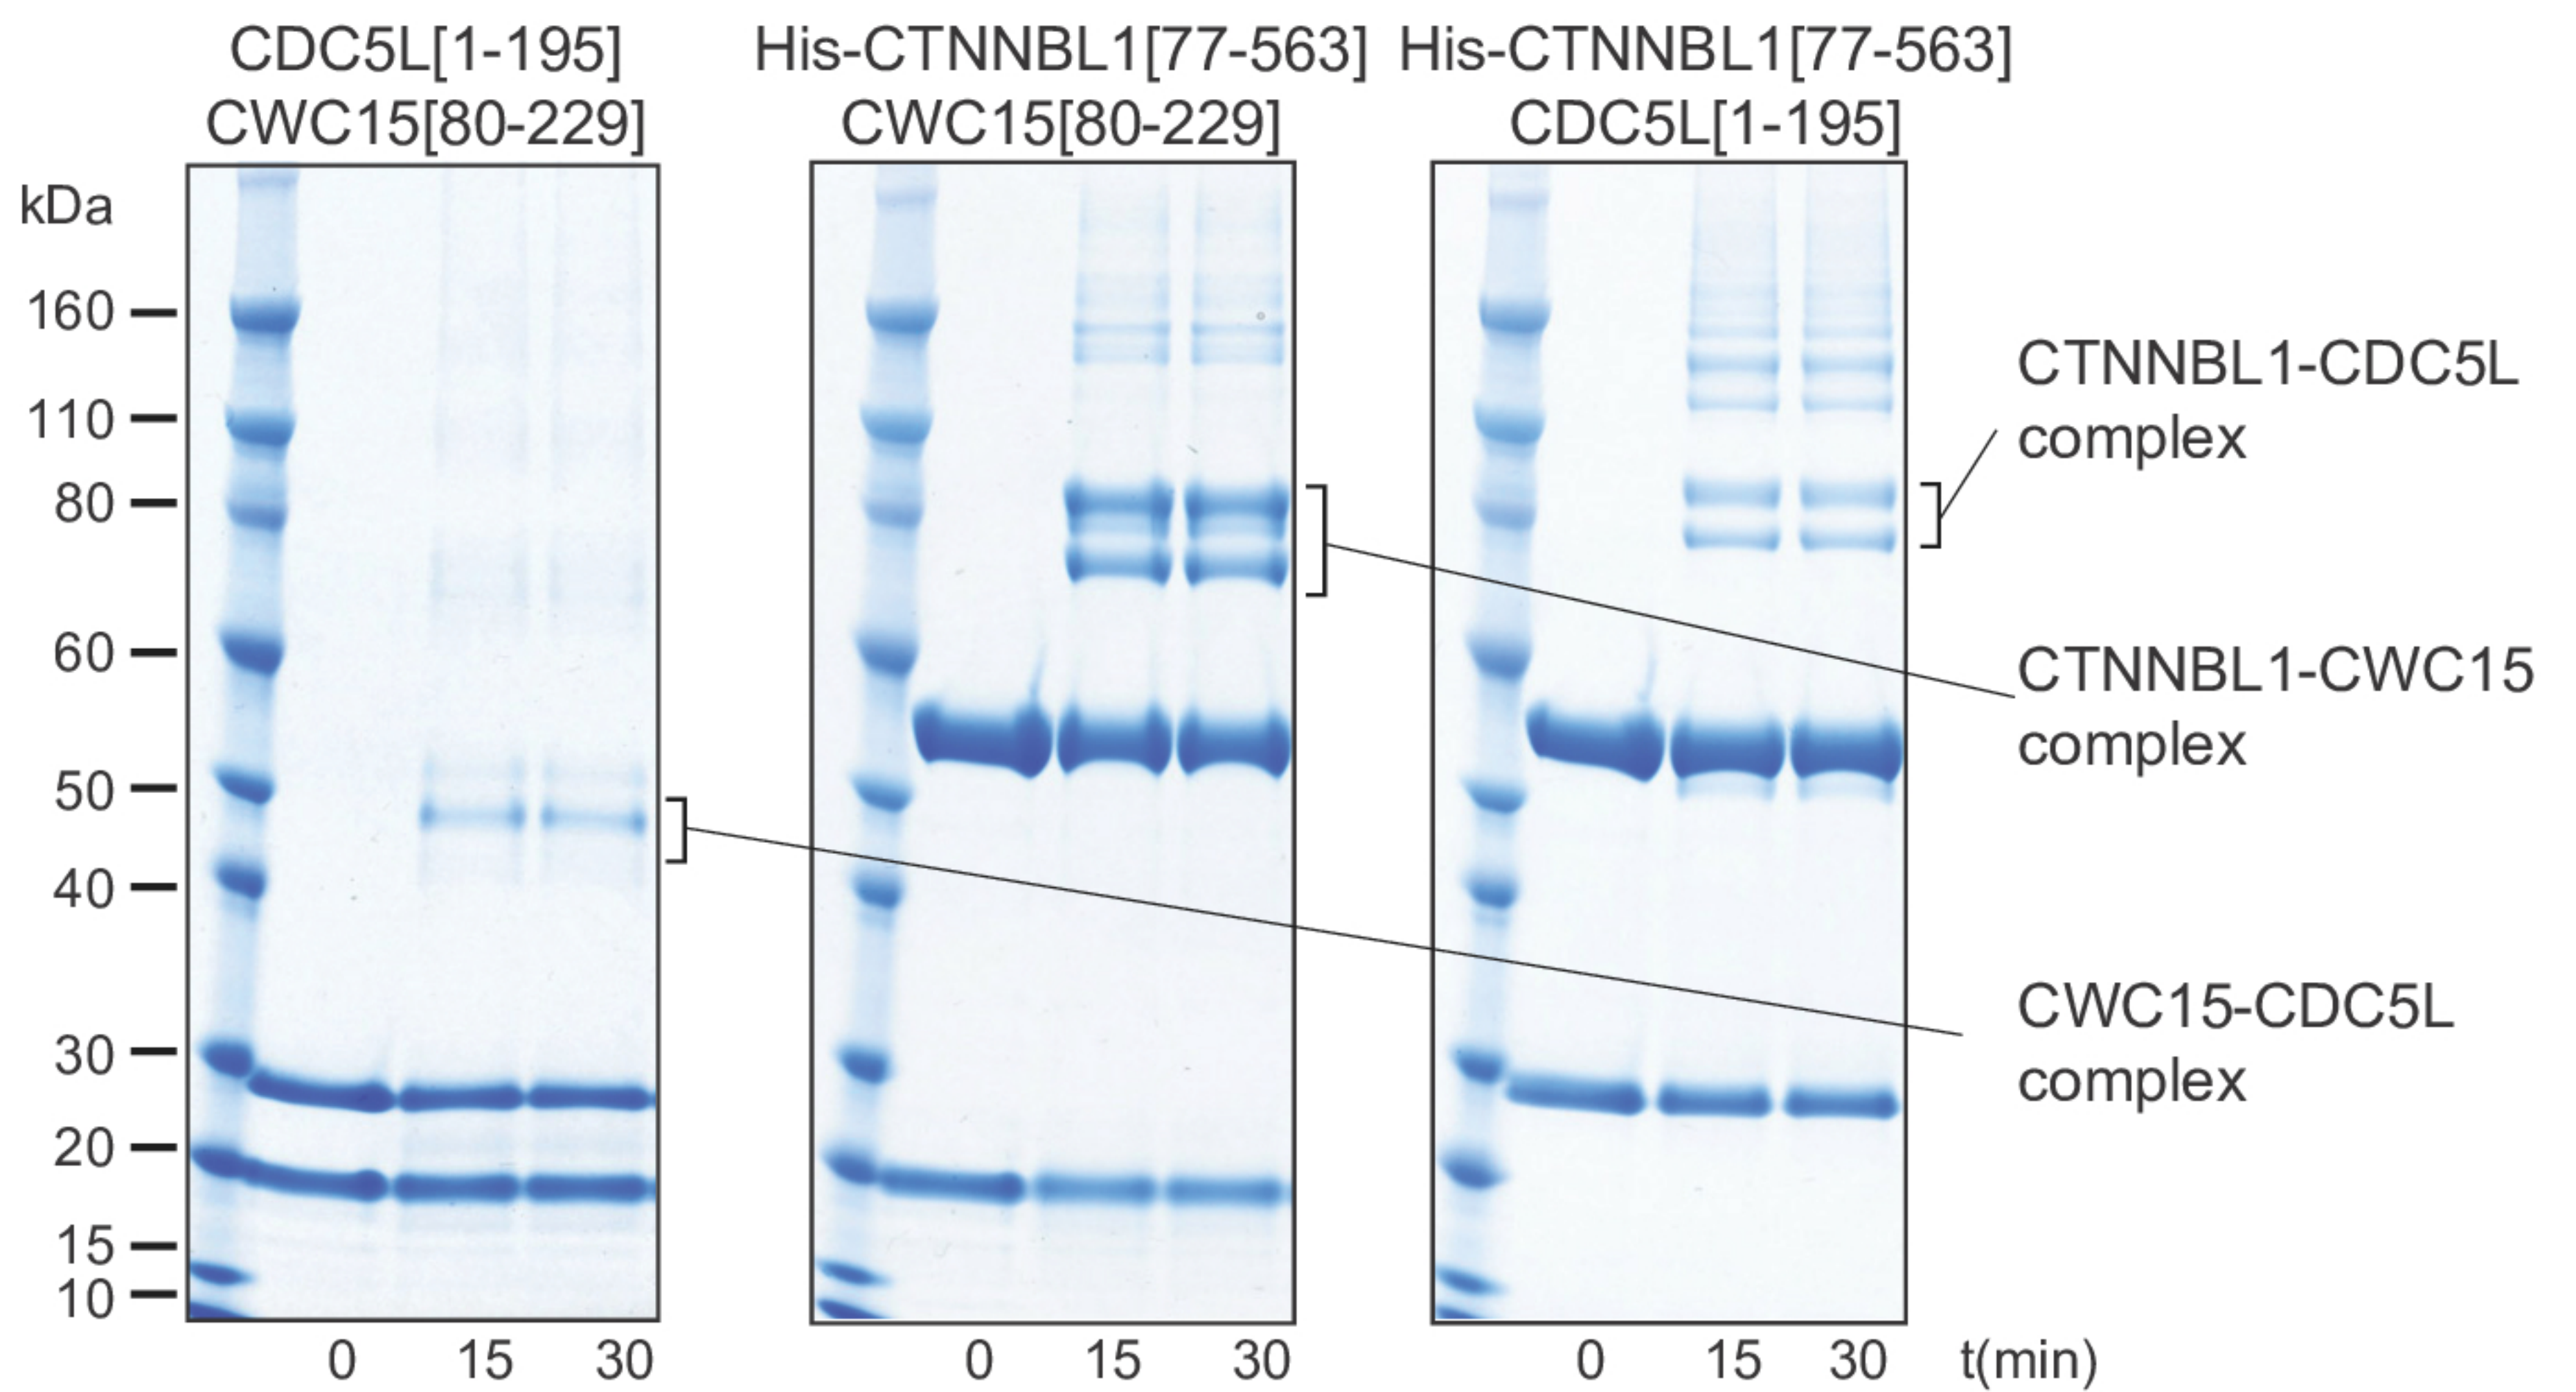

C

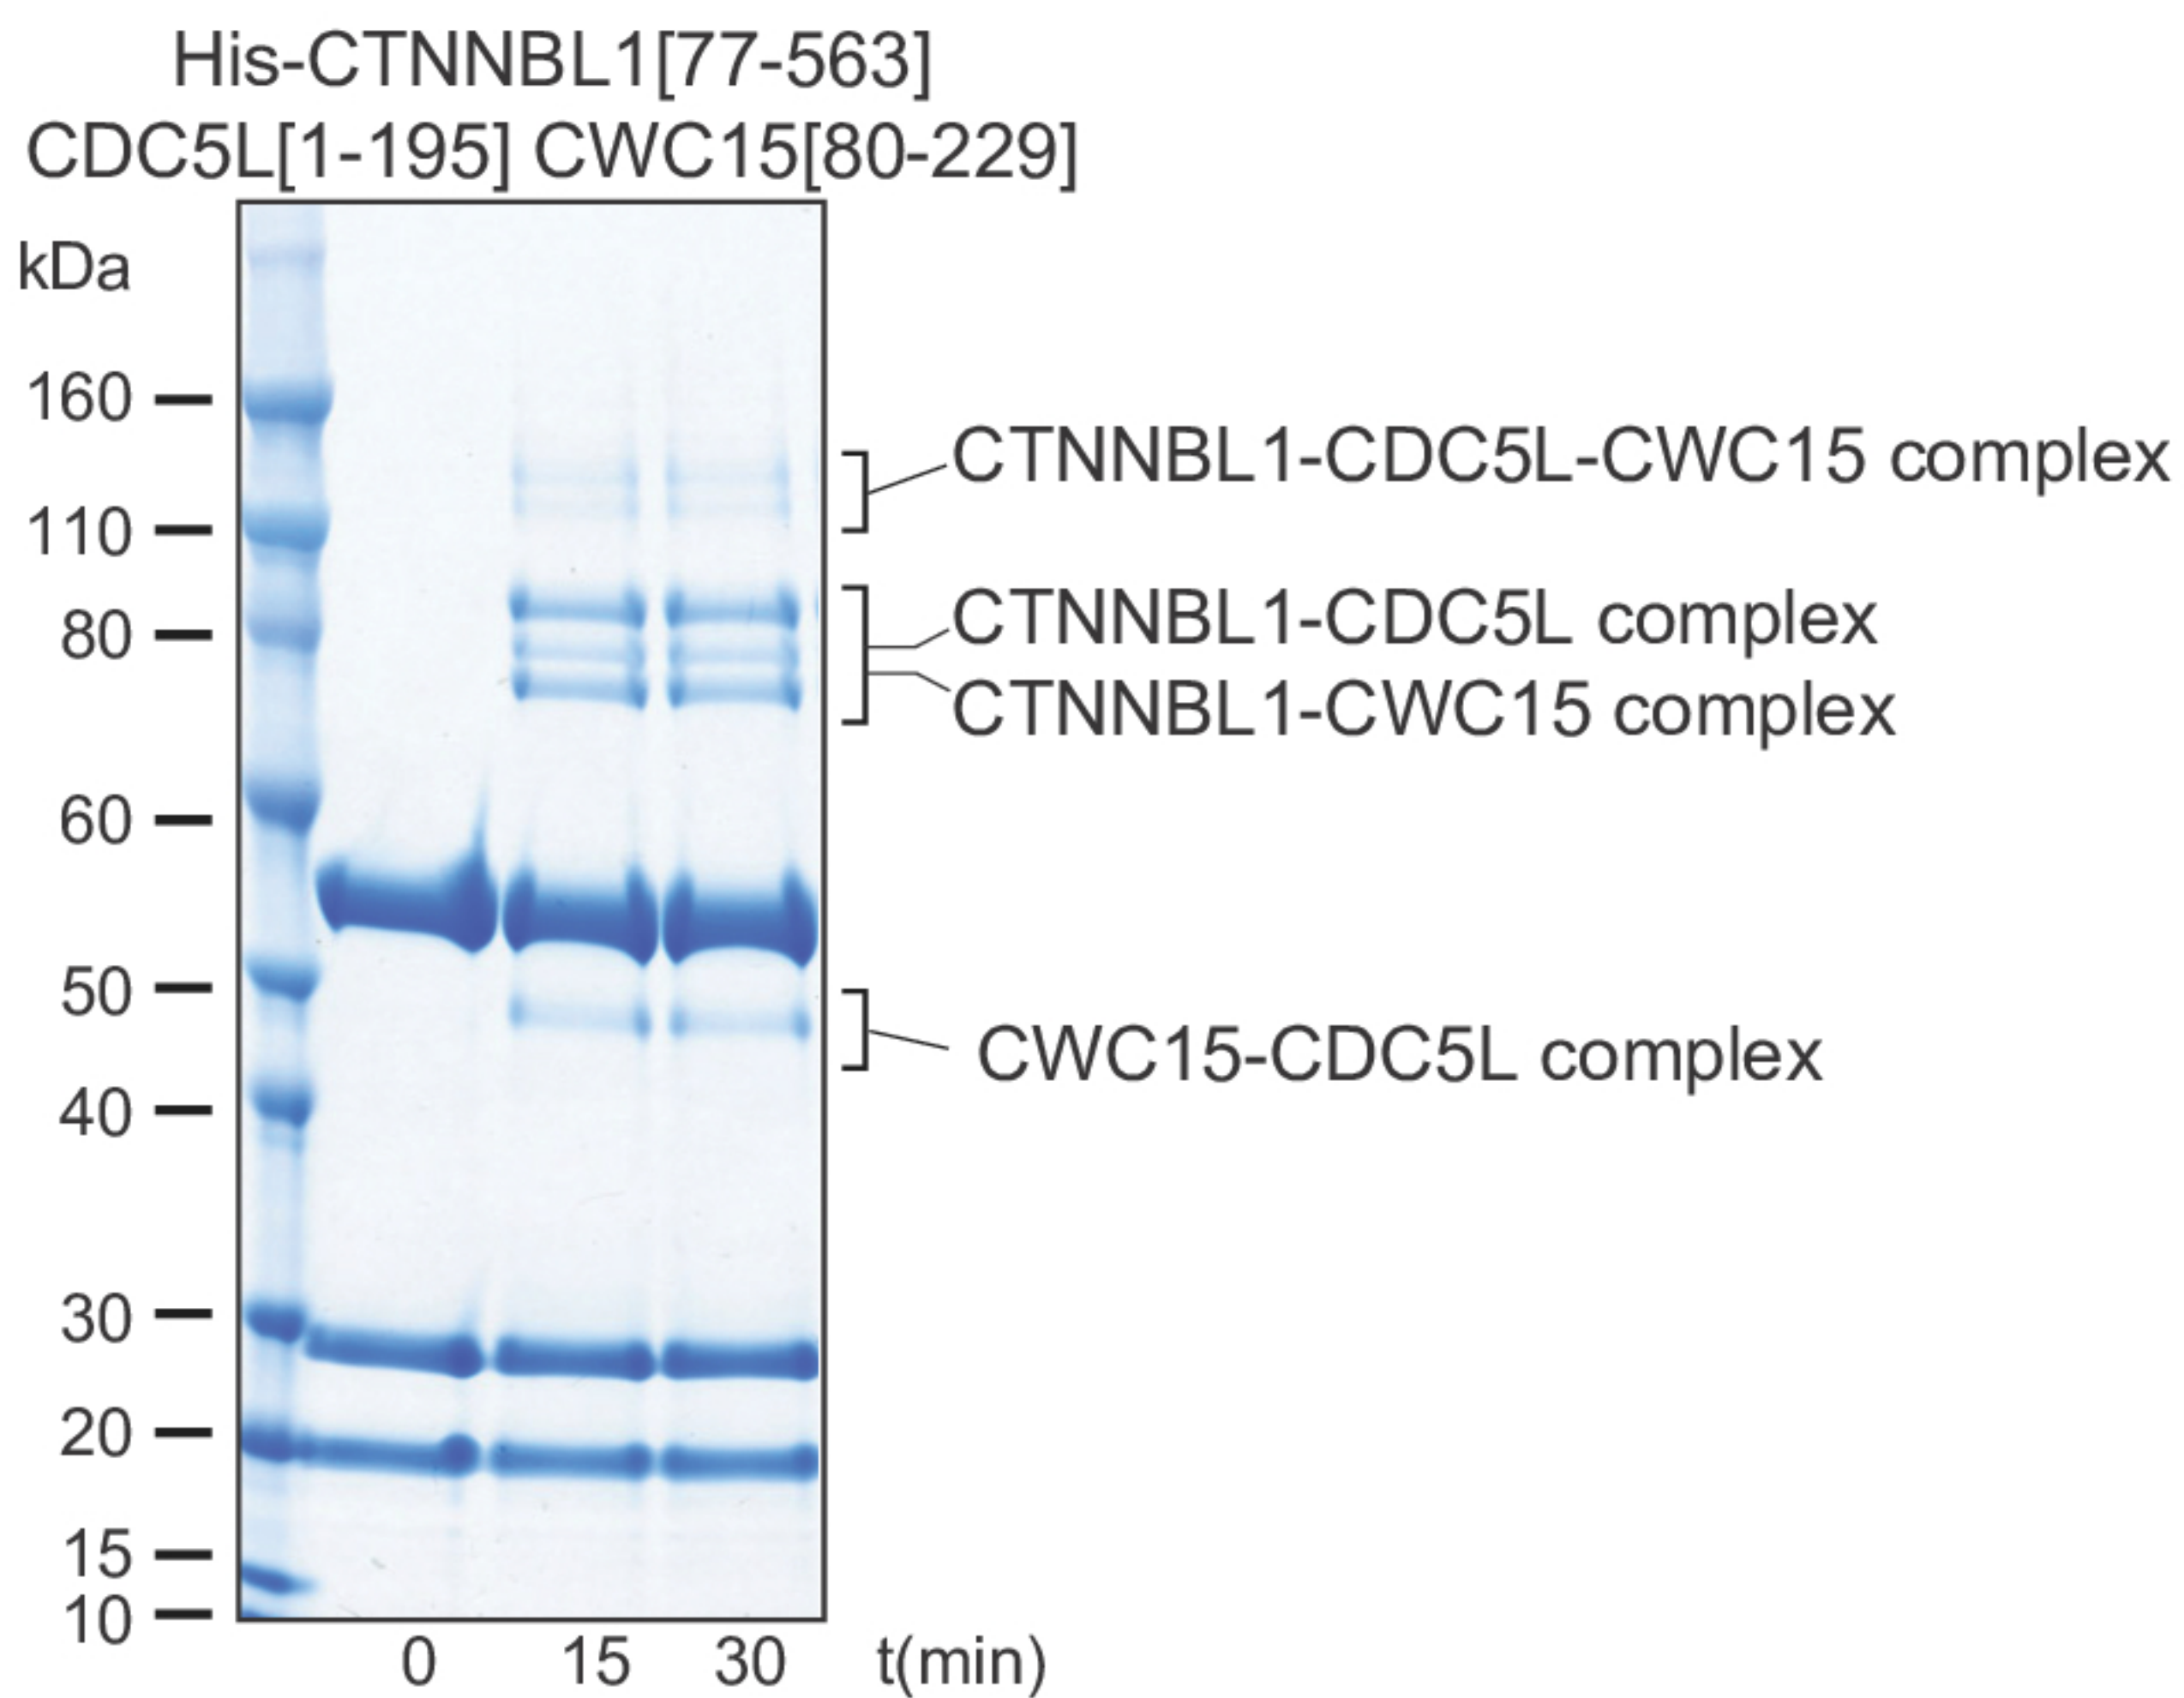



Fig. S4

A

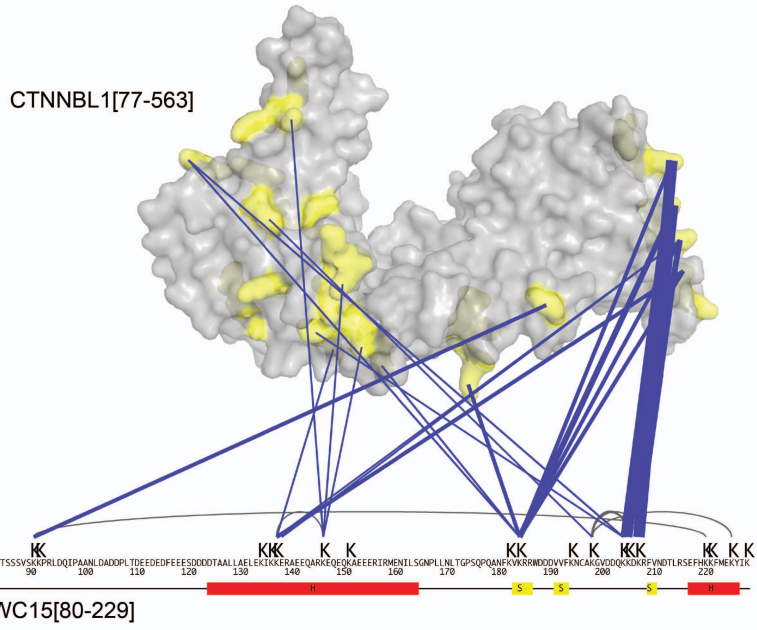

B

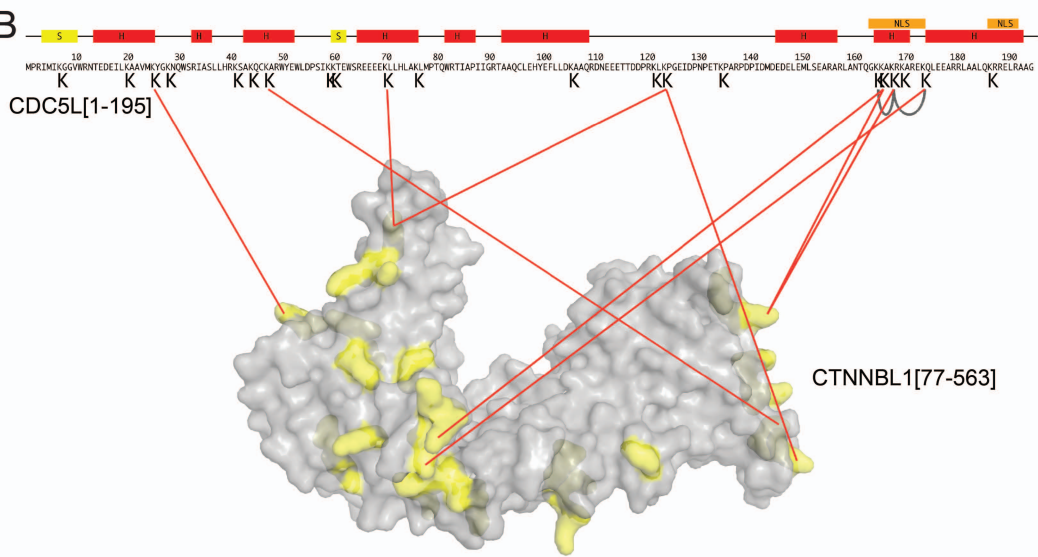

C

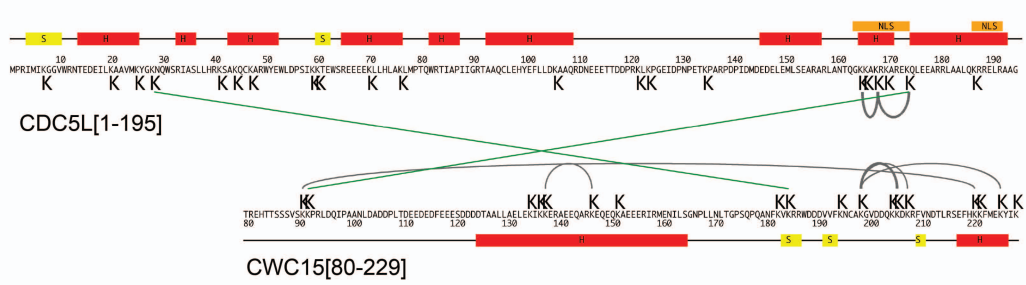

D

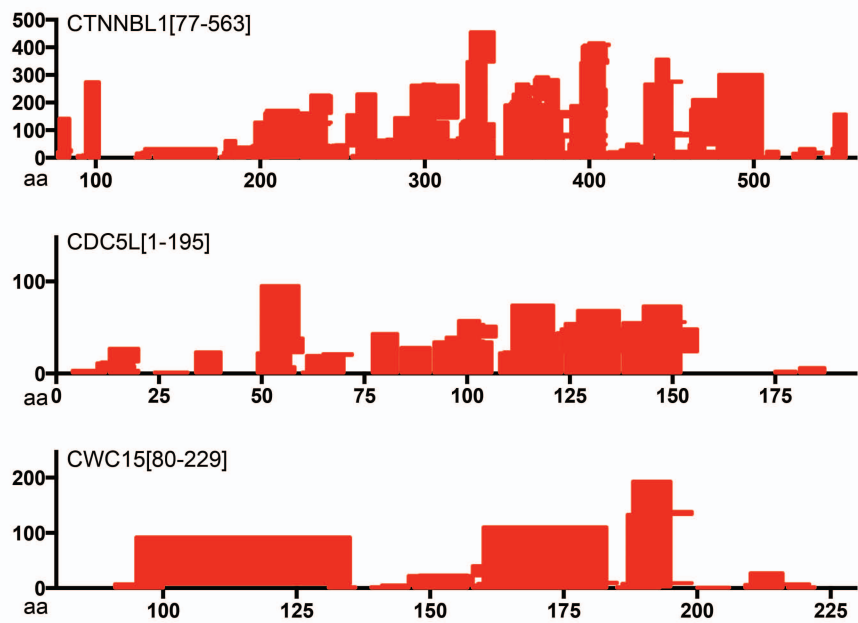

Fig. S5-A

| Start | End | CS | #D | RT            | Global HDX levels |     |     |      |       |              |     |     |      |       |                    |     |     |      |       |                    |     |     |      |       |    |    |    |   |   |   |   |   |   |   |   |   |   |   |   |   |   |     |     |   |
|-------|-----|----|----|---------------|-------------------|-----|-----|------|-------|--------------|-----|-----|------|-------|--------------------|-----|-----|------|-------|--------------------|-----|-----|------|-------|----|----|----|---|---|---|---|---|---|---|---|---|---|---|---|---|---|-----|-----|---|
|       |     |    |    |               | CTNNB1            |     |     |      |       | CTNNB1/CWC15 |     |     |      |       | CTNNB1/CWC15/CDC5L |     |     |      |       | CTNNB1/CWC15/CDC5L |     |     |      |       |    |    |    |   |   |   |   |   |   |   |   |   |   |   |   |   |   |     |     |   |
|       |     |    |    |               | 3s/4C             | 3s  | 30s | 300s | 3000s | 3s/4C        | 3s  | 30s | 300s | 3000s | 3s/4C              | 3s  | 30s | 300s | 3000s | 3s/4C              | 3s  | 30s | 300s | 3000s |    |    |    |   |   |   |   |   |   |   |   |   |   |   |   |   |   |     |     |   |
| 69    | 67  | 4  | 17 | 6.36 - 6.40   | 10%               | 18% | 20% | 30%  | 30%   | 6%           | 9%  | 15% | 24%  | 30%   | 6%                 | 9%  | 15% | 24%  | 26%   | 6%                 | 10% | 17% | 24%  | 28%   | 2  | 1  | 1  | 1 | 2 | 1 | 0 | 0 | 1 | 1 | 0 | 1 | 1 | 1 | 1 |   |   |     |     |   |
| 69    | 87  | 4  | 17 | 6.27 - 6.43   | 7%                | 9%  | 15% | 24%  | 31%   | 6%           | 9%  | 14% | 24%  | 26%   | 6%                 | 10% | 17% | 24%  | 28%   | 2                  | 1   | 1   | 1    | 2     | 1  | 0  | 0  | 1 | 1 | 0 | 0 | 1 | 1 | 1 | 1 | 1 | 1 | 1 | 1 |   |   |     |     |   |
| 69    | 87  | 5  | 17 | 6.24 - 6.55   | 7%                | 9%  | 15% | 25%  | 33%   | 6%           | 9%  | 14% | 24%  | 30%   | 6%                 | 10% | 17% | 26%  | 32%   | 2                  | 1   | 1   | 1    | 2     | 1  | 0  | 0  | 1 | 1 | 0 | 0 | 1 | 1 | 1 | 1 | 1 | 1 | 1 | 1 | 1 |   |     |     |   |
| 69    | 88  | 3  | 18 | 6.04 - 6.28   | 7%                | 9%  | 15% | 25%  | 33%   | 6%           | 9%  | 14% | 24%  | 30%   | 6%                 | 10% | 17% | 26%  | 32%   | 2                  | 1   | 1   | 1    | 2     | 1  | 0  | 0  | 1 | 1 | 0 | 0 | 1 | 1 | 1 | 1 | 1 | 1 | 1 | 1 | 1 | 1 |     |     |   |
| 69    | 88  | 3  | 18 | 6.07 - 6.47   | 7%                | 9%  | 15% | 26%  | 34%   | 6%           | 9%  | 15% | 25%  | 31%   | 6%                 | 9%  | 17% | 26%  | 33%   | 2                  | 1   | 1   | 1    | 2     | 1  | 0  | 0  | 1 | 1 | 0 | 0 | 1 | 1 | 1 | 1 | 1 | 1 | 1 | 1 | 1 | 1 | 1   |     |   |
| 69    | 88  | 5  | 18 | 6.11 - 6.28   | 6%                | 9%  | 15% | 25%  | 34%   | 6%           | 9%  | 15% | 25%  | 31%   | 6%                 | 9%  | 15% | 26%  | 33%   | 1                  | 1   | 1   | 1    | 1     | 1  | 0  | 0  | 1 | 1 | 0 | 0 | 1 | 1 | 1 | 1 | 1 | 1 | 1 | 1 | 1 | 1 | 1   |     |   |
| 88    | 98  | 2  | 9  | 3.76 - 3.96   | 1%                | 2%  | 10% | 32%  | 47%   | 2%           | 2%  | 3%  | 6%   | 22%   | 5%                 | 2%  | 3%  | 5%   | 19%   | 0                  | 0   | 0   | 1    | 3     | 1  | 0  | 0  | 0 | 1 | 1 | 0 | 0 | 1 | 1 | 1 | 1 | 1 | 1 | 1 | 1 | 1 |     |     |   |
| 88    | 98  | 2  | 9  | 3.76 - 3.96   | 1%                | 2%  | 10% | 32%  | 47%   | 1%           | 2%  | 2%  | 3%   | 6%    | 2%                 | 2%  | 3%  | 5%   | 19%   | 0                  | 0   | 0   | 1    | 3     | 1  | 0  | 0  | 0 | 1 | 1 | 0 | 0 | 1 | 1 | 1 | 1 | 1 | 1 | 1 | 1 | 1 | 1   |     |   |
| 88    | 99  | 2  | 9  | 4.75 - 4.93   | 1%                | 2%  | 10% | 33%  | 48%   | 1%           | 2%  | 2%  | 3%   | 6%    | 2%                 | 2%  | 3%  | 5%   | 18%   | 0                  | 0   | 0   | 1    | 4     | 2% | 2% | 4% | 0 | 0 | 1 | 1 | 0 | 0 | 1 | 1 | 1 | 1 | 1 | 1 | 1 | 1 | 1   | n/a |   |
| 99    | 110 | 3  | 8  | 8.35 - 8.55   | 9%                | 15% | 25% | 50%  | 56%   | 3%           | 8%  | 15% | 17%  | 25%   | 3%                 | 8%  | 15% | 16%  | 21%   | 3                  | 1   | 1   | 1    | 2     | 1  | 0  | 0  | 1 | 1 | 0 | 0 | 0 | 0 | 1 | 1 | 1 | 1 | 1 | 1 | 1 | 1 | 1   |     |   |
| 99    | 114 | 3  | 12 | 10.00 - 10.09 | 20%               | 26% | 39% | 62%  | 68%   | 14%          | 19% | 26% | 32%  | 39%   | 14%                | 18% | 26% | 31%  | 36%   | 3                  | 1   | 1   | 1    | 2     | 1  | 0  | 0  | 1 | 1 | 0 | 0 | 0 | 0 | 1 | 1 | 1 | 1 | 1 | 1 | 1 | 1 | 1   |     |   |
| 100   | 110 | 2  | 11 | 9.91 - 10.09  | 10%               | 18% | 30% | 57%  | 62%   | 3%           | 10% | 18% | 22%  | 31%   | 3%                 | 10% | 19% | 20%  | 27%   | 3                  | 1   | 1   | 1    | 2     | 1  | 0  | 0  | 1 | 1 | 0 | 0 | 1 | 1 | 1 | 1 | 1 | 1 | 1 | 1 | 1 | 1 | 1   |     |   |
| 100   | 110 | 3  | 7  | 7.61 - 7.74   | 11%               | 19% | 31% | 58%  | 63%   | 4%           | 10% | 19% | 23%  | 31%   | 3%                 | 10% | 19% | 21%  | 28%   | 4                  | 1   | 1   | 1    | 3     | 0  | 0  | 1  | 1 | 0 | 0 | 1 | 1 | 1 | 1 | 1 | 1 | 1 | 1 | 1 | 1 | 1 | 1   |     |   |
| 100   | 115 | 2  | 12 | 9.84 - 10.07  | 20%               | 26% | 39% | 62%  | 69%   | 14%          | 19% | 26% | 32%  | 39%   | 14%                | 18% | 26% | 31%  | 36%   | 3                  | 1   | 1   | 1    | 2     | 1  | 0  | 0  | 0 | 0 | 0 | 0 | 0 | 0 | 0 | 0 | 0 | 0 | 0 | 0 | 0 | 0 | 0   | 0   |   |
| 100   | 115 | 3  | 12 | 10.02 - 10.10 | 20%               | 26% | 39% | 64%  | 69%   | 14%          | 19% | 26% | 32%  | 39%   | 14%                | 18% | 26% | 30%  | 36%   | 3                  | 1   | 1   | 1    | 2     | 1  | 0  | 0  | 0 | 0 | 0 | 0 | 0 | 0 | 0 | 0 | 0 | 0 | 0 | 0 | 0 | 0 | 0   | 0   | 0 |
| 118   | 124 | 1  | 5  | 9.37 - 9.59   | 1%                | 2%  | 2%  | 15%  | 15%   | 1%           | 2%  | 2%  | 3%   | 2%    | 1%                 | 2%  | 2%  | 3%   | 2%    | 0                  | 1   | 1   | 0    | 2     | 1  | 0  | 0  | 1 | 1 | 0 | 0 | 0 | 0 | 0 | 0 | 0 | 0 | 0 | 0 | 0 | 0 | 0   | 0   |   |
| 118   | 133 | 3  | 13 | 11.09 - 11.38 | 2%                | 3%  | 10% | 13%  | 31%   | 2%           | 3%  | 10% | 16%  | 29%   | 2%                 | 3%  | 10% | 15%  | 21%   | 31%                | 2   | 0   | 1    | 0     | 1  | 0  | 0  | 0 | 0 | 0 | 0 | 0 | 0 | 0 | 0 | 0 | 0 | 0 | 0 | 0 | 0 | 0   | 0   |   |
| 120   | 124 | 1  | 3  | 7.18 - 7.44   | 0%                | 1%  | 1%  | 2%   | 13%   | 0%           | 1%  | 2%  | 3%   | 2%    | 0%                 | 1%  | 2%  | 2%   | 5%    | 1                  | 1   | 0   | 2    | 1     | 1  | 0  | 0  | 1 | 1 | 0 | 0 | 1 | 1 | 1 | 1 | 1 | 1 | 1 | 1 | 1 | 1 | 1   |     |   |
| 120   | 133 | 5  | 7  | 7.59 - 7.79   | 2%                | 2%  | 10% | 14%  | 21%   | 2%           | 2%  | 10% | 18%  | 34%   | 2%                 | 2%  | 17% | 22%  | 37%   | 2                  | 0   | 1   | 0    | 1     | 1  | 0  | 0  | 1 | 1 | 0 | 0 | 1 | 1 | 1 | 1 | 1 | 1 | 1 | 1 | 1 | 1 | 1   | 1   |   |
| 125   | 133 | 2  | 6  | 8.49 - 8.78   | 2%                | 3%  | 5%  | 8%   | 26%   | 2%           | 2%  | 5%  | 14%  | 29%   | 2%                 | 2%  | 5%  | 14%  | 26%   | 2                  | 0   | 1   | 0    | 2     | 0  | 0  | 0  | 0 | 0 | 0 | 0 | 0 | 0 | 0 | 0 | 0 | 0 | 0 | 0 | 0 | 0 | 0   |     |   |
| 125   | 140 | 3  | 13 | 11.63 - 11.89 | 3%                | 3%  | 5%  | 13%  | 34%   | 3%           | 3%  | 5%  | 13%  | 34%   | 3%                 | 3%  | 5%  | 13%  | 40%   | 1                  | 1   | 0   | 0    | 1     | 1  | 0  | 0  | 1 | 1 | 0 | 0 | 0 | 0 | 0 | 0 | 0 | 0 | 0 | 0 | 0 | 0 | 0   | 0   |   |
| 131   | 140 | 2  | 8  | 11.79 - 11.96 | 2%                | 2%  | 3%  | 4%   | 16%   | 3%           | 3%  | 4%  | 16%  | 36%   | 4%                 | 5%  | 6%  | 19%  | 36%   | 5%                 | 5%  | 9%  | 21%  | 40%   | 0  | 0  | 1  | 1 | 0 | 0 | 1 | 1 | 1 | 1 | 1 | 1 | 1 | 1 | 1 | 1 | 1 | 1   | n/a |   |
| 141   | 150 | 2  | 8  | 11.50 - 11.66 | 4%                | 8%  | 18% | 24%  | 29%   | 6%           | 9%  | 19% | 22%  | 28%   | 2%                 | 9%  | 20% | 23%  | 30%   | 4                  | 0   | 1   | 1    | 1     | 0  | 0  | 0  | 0 | 0 | 0 | 0 | 0 | 0 | 0 | 0 | 0 | 0 | 0 | 0 | 0 | 0 | 0   | 0   |   |
| 147   | 158 | 2  | 10 | 7.88 - 8.00   | 2%                | 3%  | 8%  | 10%  | 14%   | 2%           | 4%  | 8%  | 10%  | 14%   | 2%                 | 4%  | 8%  | 12%  | 1%    | 3                  | 0   | 0   | 1    | 2     | 0  | 0  | 0  | 0 | 0 | 0 | 0 | 0 | 0 | 0 | 0 | 0 | 0 | 0 | 0 | 0 | 0 | 0   |     |   |
| 147   | 165 | 2  | 12 | 8.95 - 9.11   | 3%                | 4%  | 11% | 15%  | 19%   | 2%           | 4%  | 12% | 13%  | 17%   | 1%                 | 5%  | 11% | 12%  | 16%   | 3                  | 0   | 0   | 0    | 1     | 2  | 0  | 0  | 0 | 0 | 0 | 0 | 0 | 0 | 0 | 0 | 0 | 0 | 0 | 0 | 0 | 0 | 0   | 0   |   |
| 147   | 165 | 2  | 12 | 9.53 - 9.71   | 3%                | 4%  | 11% | 15%  | 19%   | 2%           | 4%  | 11% | 12%  | 15%   | 2%                 | 4%  | 11% | 11%  | 15%   | 3                  | 0   | 0   | 0    | 1     | 2  | 0  | 0  | 0 | 0 | 0 | 0 | 0 | 0 | 0 | 0 | 0 | 0 | 0 | 0 | 0 | 0 | 0   | 0   |   |
| 148   | 159 | 2  | 10 | 7.80 - 8.00   | 2%                | 3%  | 4%  | 10%  | 14%   | 2%           | 4%  | 8%  | 10%  | 14%   | 2%                 | 4%  | 8%  | 11%  | 1%    | 2                  | 0   | 0   | 1    | 2     | 0  | 0  | 0  | 0 | 0 | 0 | 0 | 0 | 0 | 0 | 0 | 0 | 0 | 0 | 0 | 0 | 0 | 0   |     |   |
| 160   | 164 | 1  | 3  | 8.38 - 8.63   | 3%                | 4%  | 10% | 15%  | 15%   | 4%           | 6%  | 8%  | 10%  | 15%   | 4%                 | 6%  | 8%  | 10%  | 12%   | 1                  | 1   | 1   | 1    | 2     | 0  | 0  | 0  | 0 | 0 | 0 | 0 | 0 | 0 | 0 | 0 | 0 | 0 | 0 | 0 | 0 | 0 | 0   | 0   |   |
| 161   | 176 | 2  | 14 | 11.38 - 11.51 | 2%                | 2%  | 10% | 23%  | 30%   | 2%           | 2%  | 10% | 24%  | 30%   | 2%                 | 2%  | 11% | 24%  | 29%   | 37%                | 0   | 0   | 1    | 0     | 1  | 0  | 0  | 0 | 0 | 0 | 0 | 0 | 0 | 0 | 0 | 0 | 0 | 0 | 0 | 0 | 0 | 0   |     |   |
| 165   | 170 | 1  | 4  | 8.14 - 8.24   | 0%                | 0%  | 1%  | 1%   | 4%    | 0%           | 0%  | 1%  | 1%   | 4%    | 0%                 | 0%  | 1%  | 1%   | 4%    | 0%                 | 0   | 0   | 0    | 1     | 0  | 0  | 0  | 0 | 0 | 0 | 0 | 0 | 0 | 0 | 0 | 0 | 0 | 0 | 0 | 0 | 0 |     |     |   |
| 165   | 173 | 1  | 7  | 8.18 - 8.45   | 3%                | 2%  | 2%  | 8%   | 24%   | 3%           | 2%  | 3%  | 13%  | 18%   | 27%                | 3%  | 2%  | 3%   | 13%   | 4                  | 1   | 1   | 1    | 1     | 0  | 0  | 0  | 0 | 0 | 0 | 0 | 0 | 0 | 0 | 0 | 0 | 0 | 0 | 0 | 0 | 0 | 0   |     |   |
| 165   | 181 | 2  | 15 | 8.52 - 8.71   | 2%                | 2%  | 6%  | 9%   | 14%   | 2%           | 2%  | 6%  | 9%   | 14%   | 2%                 | 2%  | 6%  | 9%   | 12%   | 1                  | 0   | 1   | 1    | 3     | 0  | 0  | 0  | 0 | 0 | 0 | 0 | 0 | 0 | 0 | 0 | 0 | 0 | 0 | 0 | 0 | 0 | 0   | 0   |   |
| 171   | 184 | 2  | 12 | 8.30 - 8.45   | 3%                | 4%  | 15% | 24%  | 40%   | 5%           | 13% | 24% | 36%  | 42%   | 9%                 | 22% | 36% | 43%  | 50%   | 0                  | 1   | 1   | 1    | 2     | 2  | 2  | 2  | 2 | 2 | 2 | 2 | 2 | 2 | 2 | 2 | 2 | 2 | 2 | 2 | 2 | 2 | n/a |     |   |
| 181   | 196 | 2  | 17 | 8.28 - 11.41  | 1%                | 1%  | 1%  | 2%   | 6%    | 1%           | 1%  | 1%  | 2%   | 6%    | 1%                 | 1%  | 1%  | 2%   | 6%    | 1%                 | 0   | 0   | 0    | 0     | 0  | 0  | 0  | 0 | 0 | 0 | 0 | 0 | 0 | 0 | 0 | 0 | 0 | 0 | 0 | 0 | 0 |     |     |   |
| 185   | 196 | 2  | 10 | 9.96 - 10.20  | 1%                | 1%  | 1%  | 5%   | 22%   | 1%           | 1%  | 2%  | 8%   | 28%   | 1%                 | 1%  | 3%  | 12%  | 35%   | 0                  | 0   | 0   | 0    | 0     | 0  | 0  | 0  | 0 | 0 | 0 | 0 | 0 | 0 | 0 | 0 | 0 | 0 | 0 | 0 | 0 | 0 | 0   |     |   |
| 185   | 197 | 2  | 11 | 11.23 - 11.38 | 0%                | 0%  | 0%  | 1%   | 4%    | 0%           | 0%  | 1%  | 4%   | 22%   | -1%                | 1%  | 2%  | 8%   | 27%   | 0                  | 0   | 0   | 0    | 0     | 0  | 0  | 0  | 0 | 0 | 0 | 0 | 0 | 0 | 0 | 0 | 0 | 0 | 0 | 0 | 0 | 0 | n/a |     |   |
| 197   | 206 | 2  | 7  | 7.64 - 7.81   |                   |     |     |      |       |              |     |     |      |       |                    |     |     |      |       |                    |     |     |      |       |    |    |    |   |   |   |   |   |   |   |   |   |   |   |   |   |   |     |     |   |

Fig. S5-B

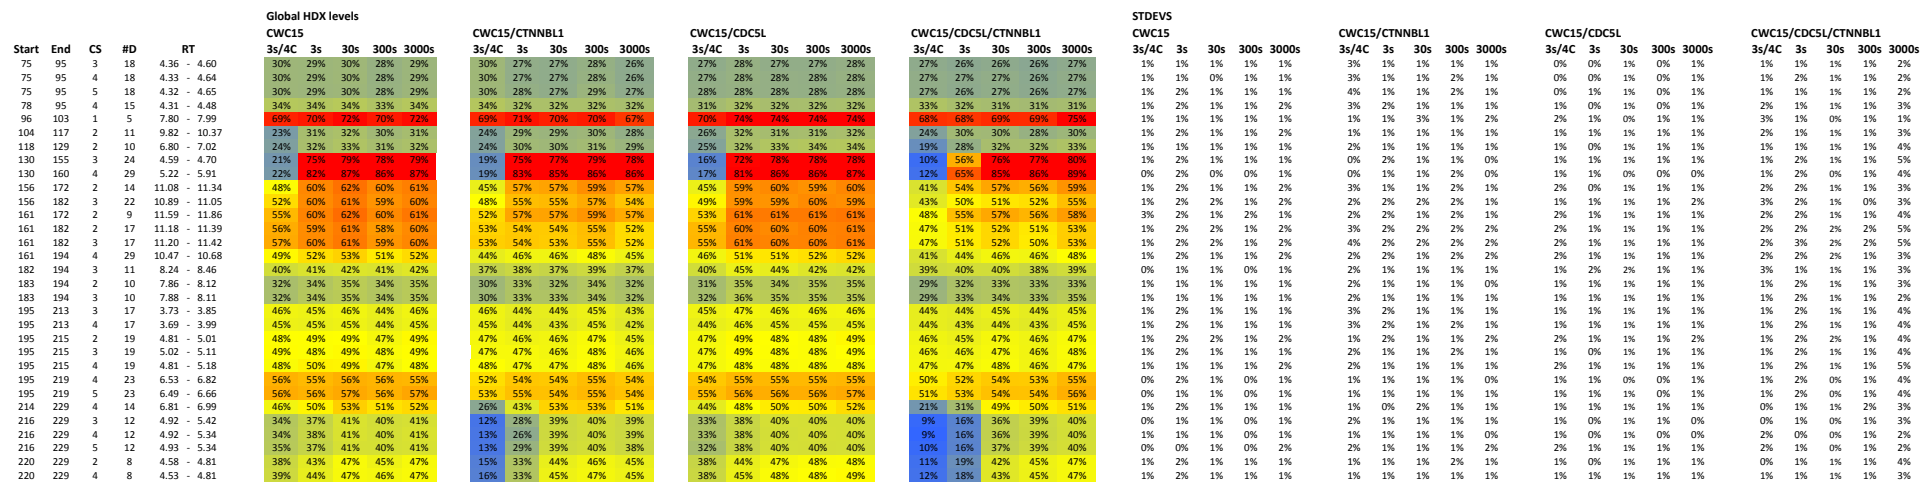

Fig. S5-C

| Start | End | CS | #D | RT            | Global HDX levels |     |     |      |       | STDEVS      |     |     |      |       |                    |     |     |      |       |   |   |   |   |   |   |   |   |   |   |   |   |   |   |     |   |   |   |
|-------|-----|----|----|---------------|-------------------|-----|-----|------|-------|-------------|-----|-----|------|-------|--------------------|-----|-----|------|-------|---|---|---|---|---|---|---|---|---|---|---|---|---|---|-----|---|---|---|
|       |     |    |    |               | CDC5L             |     |     |      |       | CDC5L/CWC15 |     |     |      |       | CDC5L/CWC15/CTNNB1 |     |     |      |       |   |   |   |   |   |   |   |   |   |   |   |   |   |   |     |   |   |   |
|       |     |    |    |               | 3s/4C             | 3s  | 30s | 300s | 3000s | 3s/4C       | 3s  | 30s | 300s | 3000s | 3s/4C              | 3s  | 30s | 300s | 3000s |   |   |   |   |   |   |   |   |   |   |   |   |   |   |     |   |   |   |
| 11    | 19  | 2  | 7  | 8.83 - 9.10   | 3%                | 9%  | 24% | 35%  | 37%   | 4%          | 9%  | 22% | 37%  | 39%   | 6%                 | 8%  | 17% | 29%  | 37%   | 0 | 1 | 1 | 1 | 1 | 0 | 0 | 2 | 1 | 1 | 0 | 1 | 1 | 1 | 4   |   |   |   |
| 18    | 24  | 2  | 5  | 6.68 - 6.91   | 0%                | 9%  | 62% | 80%  | 82%   | 1%          | 6%  | 45% | 82%  | 83%   | 3%                 | 6%  | 25% | 63%  | 71%   | 0 | 1 | 1 | 1 | 2 | 1 | 1 | 3 | 2 | 1 | 1 | 2 | 3 | 0 | n/a |   |   |   |
| 20    | 37  | 4  | 16 | 7.72 - 8.05   | 19%               | 31% | 58% | 61%  | 62%   | 18%         | 28% | 50% | 63%  | 65%   | 13%                | 24% | 41% | 59%  | 66%   | 1 | 2 | 1 | 2 | 1 | 0 | 1 | 2 | 1 | 0 | 0 | 2 | 1 | 1 | 4   |   |   |   |
| 20    | 38  | 4  | 17 | 9.42 - 9.75   | 19%               | 30% | 59% | 64%  | 65%   | 17%         | 26% | 49% | 65%  | 66%   | 12%                | 22% | 40% | 60%  | 68%   | 0 | 1 | 1 | 0 | 0 | 1 | 0 | 1 | 0 | 1 | 0 | 1 | 1 | 4 |     |   |   |   |
| 22    | 37  | 3  | 14 | 8.32 - 8.63   | 20%               | 31% | 56% | 59%  | 60%   | 18%         | 28% | 49% | 62%  | 62%   | 13%                | 23% | 40% | 57%  | 63%   | 1 | 2 | 1 | 1 | 1 | 1 | 0 | 2 | 0 | 1 | 0 | 1 | 1 | 4 |     |   |   |   |
| 22    | 37  | 4  | 14 | 8.34 - 8.65   | 20%               | 31% | 56% | 59%  | 60%   | 18%         | 27% | 49% | 61%  | 62%   | 13%                | 23% | 40% | 57%  | 63%   | 1 | 1 | 2 | 1 | 2 | 1 | 1 | 0 | 2 | 1 | 1 | 0 | 1 | 1 | 4   |   |   |   |
| 22    | 38  | 3  | 15 | 9.93 - 10.20  | 20%               | 30% | 58% | 61%  | 63%   | 17%         | 26% | 48% | 63%  | 64%   | 12%                | 22% | 38% | 57%  | 61%   | 1 | 2 | 1 | 1 | 1 | 1 | 1 | 0 | 2 | 0 | 1 | 1 | 1 | 1 | 1   | 4 |   |   |
| 22    | 50  | 6  | 27 | 7.61 - 7.79   | 10%               | 17% | 36% | 37%  | 39%   | 12%         | 17% | 34% | 43%  | 44%   | 7%                 | 12% | 25% | 37%  | 42%   | 0 | 1 | 1 | 0 | 1 | 1 | 1 | 1 | 0 | 1 | 0 | 1 | 0 | 1 | 4   |   |   |   |
| 24    | 37  | 3  | 12 | 8.28 - 8.59   | 22%               | 34% | 62% | 63%  | 65%   | 20%         | 30% | 53% | 67%  | 67%   | 14%                | 25% | 42% | 63%  | 68%   | 1 | 2 | 1 | 0 | 1 | 0 | 1 | 2 | 0 | 1 | 0 | 1 | 0 | 1 | 4   |   |   |   |
| 25    | 37  | 2  | 11 | 7.87 - 8.23   | 20%               | 29% | 53% | 55%  | 57%   | 20%         | 29% | 45% | 58%  | 59%   | 13%                | 23% | 35% | 52%  | 58%   | 1 | 1 | 1 | 1 | 2 | 1 | 0 | 1 | 1 | 0 | 0 | 1 | 1 | 4 |     |   |   |   |
| 25    | 37  | 3  | 11 | 7.93 - 8.19   | 20%               | 29% | 52% | 54%  | 56%   | 18%         | 27% | 43% | 56%  | 56%   | 13%                | 22% | 34% | 51%  | 57%   | 1 | 1 | 1 | 1 | 0 | 1 | 0 | 2 | 1 | 0 | 0 | 1 | 0 | 1 | 3   |   |   |   |
| 38    | 50  | 2  | 11 | 3.48 - 3.74   | 2%                | 11% | 26% | 26%  | 27%   | 2%          | 8%  | 24% | 27%  | 28%   | 1%                 | 3%  | 15% | 25%  | 27%   | 0 | 1 | 0 | 0 | 0 | 0 | 0 | 1 | 0 | 1 | 0 | 0 | 1 | 2 |     |   |   |   |
| 38    | 50  | 3  | 11 | 3.48 - 3.70   | 2%                | 11% | 26% | 26%  | 27%   | 2%          | 8%  | 24% | 28%  | 27%   | 1%                 | 3%  | 15% | 25%  | 27%   | 0 | 1 | 0 | 0 | 0 | 0 | 0 | 1 | 0 | 1 | 0 | 1 | 0 | 1 | 2   |   |   |   |
| 38    | 50  | 4  | 11 | 3.49 - 3.77   | 2%                | 11% | 26% | 26%  | 27%   | 2%          | 8%  | 25% | 28%  | 28%   | 2%                 | 3%  | 15% | 26%  | 27%   | 0 | 1 | 0 | 0 | 0 | 0 | 0 | 1 | 1 | 1 | 0 | 0 | 1 | 2 |     |   |   |   |
| 38    | 50  | 5  | 11 | 3.56 - 3.73   | 2%                | 12% | 26% | 26%  | 27%   | 2%          | 8%  | 25% | 28%  | 28%   | 1%                 | 3%  | 15% | 26%  | 27%   | 0 | 1 | 0 | 0 | 1 | 0 | 0 | 1 | 0 | 1 | 0 | 1 | 0 | 1 | 2   |   |   |   |
| 38    | 71  | 6  | 31 | 8.08 - 8.33   | 11%               | 19% | 37% | 41%  | 42%   | 11%         | 19% | 34% | 44%  | 45%   | 10%                | 15% | 28% | 40%  | 43%   | 1 | 1 | 1 | 1 | 1 | 1 | 0 | 2 | 1 | 0 | 1 | 1 | 1 | 3 |     |   |   |   |
| 39    | 50  | 4  | 10 | 3.48 - 3.72   | 2%                | 12% | 28% | 28%  | 29%   | 2%          | 8%  | 26% | 30%  | 30%   | 2%                 | 3%  | 16% | 28%  | 29%   | 0 | 1 | 1 | 0 | 0 | 0 | 0 | 1 | 1 | 1 | 1 | 1 | 0 | 1 | 3   |   |   |   |
| 51    | 66  | 4  | 13 | 8.62 - 8.82   | 19%               | 26% | 34% | 34%  | 35%   | 20%         | 29% | 37% | 40%  | 40%   | 17%                | 25% | 33% | 35%  | 37%   | 1 | 2 | 1 | 0 | 1 | 1 | 1 | 1 | 1 | 1 | 1 | 1 | 1 | 3 |     |   |   |   |
| 51    | 71  | 4  | 18 | 8.59 - 8.83   | 12%               | 20% | 35% | 40%  | 41%   | 13%         | 22% | 35% | 46%  | 46%   | 12%                | 19% | 32% | 42%  | 45%   | 1 | 1 | 1 | 1 | 1 | 1 | 0 | 2 | 1 | 1 | 1 | 1 | 1 | 3 |     |   |   |   |
| 51    | 74  | 4  | 21 | 9.42 - 9.73   | 12%               | 21% | 44% | 52%  | 53%   | 13%         | 22% | 41% | 55%  | 56%   | 12%                | 19% | 36% | 51%  | 54%   | 1 | 2 | 1 | 1 | 1 | 1 | 1 | 0 | 3 | 1 | 1 | 1 | 1 | 3 |     |   |   |   |
| 51    | 86  | 6  | 32 | 10.07 - 10.26 | 16%               | 29% | 56% | 62%  | 63%   | 15%         | 27% | 52% | 65%  | 65%   | 13%                | 22% | 46% | 61%  | 65%   | 1 | 2 | 1 | 1 | 1 | 1 | 1 | 0 | 2 | 1 | 1 | 1 | 1 | 1 | 3   |   |   |   |
| 51    | 96  | 6  | 41 | 10.32 - 10.54 | 18%               | 39% | 65% | 71%  | 72%   | 17%         | 35% | 61% | 71%  | 72%   | 15%                | 30% | 57% | 69%  | 73%   | 1 | 2 | 0 | 1 | 1 | 1 | 1 | 1 | 0 | 2 | 1 | 1 | 1 | 1 | 0   | 3 |   |   |
| 51    | 98  | 6  | 43 | 10.78 - 11.02 | 17%               | 38% | 66% | 71%  | 73%   | 15%         | 34% | 62% | 73%  | 73%   | 13%                | 30% | 59% | 71%  | 74%   | 1 | 2 | 0 | 1 | 1 | 1 | 1 | 1 | 0 | 2 | 1 | 1 | 1 | 1 | 0   | 3 |   |   |
| 72    | 86  | 3  | 12 | 8.88 - 9.15   | 17%               | 34% | 55% | 54%  | 56%   | 18%         | 33% | 56% | 60%  | 61%   | 13%                | 25% | 51% | 56%  | 58%   | 1 | 2 | 1 | 1 | 1 | 1 | 1 | 0 | 2 | 1 | 1 | 1 | 0 | 1 | 4   |   |   |   |
| 75    | 86  | 3  | 9  | 8.16 - 8.45   | 23%               | 42% | 58% | 58%  | 61%   | 34%         | 46% | 60% | 63%  | 64%   | 24%                | 36% | 55% | 57%  | 60%   | 1 | 2 | 0 | 1 | 3 | 1 | 1 | 2 | 1 | 2 | 1 | 2 | 1 | 2 | 2   | 4 |   |   |
| 75    | 96  | 3  | 18 | 9.03 - 9.26   | 21%               | 53% | 72% | 71%  | 73%   | 19%         | 46% | 73% | 75%  | 76%   | 17%                | 41% | 70% | 73%  | 75%   | 0 | 2 | 0 | 1 | 1 | 1 | 1 | 1 | 0 | 1 | 1 | 1 | 1 | 1 | 0   | 1 | 4 |   |
| 87    | 96  | 2  | 8  | 5.80 - 6.23   | 23%               | 60% | 75% | 74%  | 76%   | 20%         | 53% | 73% | 75%  | 77%   | 18%                | 46% | 70% | 71%  | 73%   | 1 | 1 | 1 | 1 | 1 | 1 | 1 | 2 | 1 | 1 | 1 | 1 | 1 | 5 |     |   |   |   |
| 87    | 98  | 2  | 10 | 7.97 - 8.26   | 16%               | 45% | 64% | 63%  | 66%   | 15%         | 40% | 66% | 67%  | 69%   | 14%                | 39% | 67% | 67%  | 69%   | 0 | 3 | 2 | 2 | 1 | 1 | 1 | 0 | 2 | 1 | 1 | 1 | 1 | 1 | 1   | 4 |   |   |
| 96    | 103 | 2  | 6  | 10.20 - 10.47 | 1%                | 8%  | 29% | 30%  | 30%   | 1%          | 6%  | 28% | 33%  | 33%   | 2%                 | 6%  | 29% | 31%  | 32%   | 0 | 1 | 1 | 1 | 1 | 1 | 0 | 1 | 0 | 1 | 0 | 1 | 1 | 1 | 3   |   |   |   |
| 97    | 102 | 2  | 4  | 8.59 - 8.88   | 1%                | 12% | 42% | 42%  | 43%   | 1%          | 9%  | 39% | 44%  | 44%   | 2%                 | 9%  | 37% | 38%  | 40%   | 0 | 1 | 0 | 1 | 1 | 1 | 0 | 0 | 2 | 1 | 0 | 0 | 1 | 1 | 1   | 4 |   |   |
| 97    | 103 | 2  | 5  | 10.00 - 10.29 | 2%                | 8%  | 30% | 30%  | 31%   | 1%          | 6%  | 28% | 33%  | 34%   | 2%                 | 6%  | 26% | 28%  | 30%   | 0 | 1 | 0 | 0 | 1 | 1 | 1 | 0 | 1 | 1 | 1 | 0 | 1 | 1 | 1   | 3 |   |   |
| 98    | 104 | 2  | 5  | 10.00 - 10.29 | 1%                | 8%  | 30% | 30%  | 31%   | 1%          | 6%  | 28% | 33%  | 33%   | 1%                 | 6%  | 26% | 28%  | 29%   | 0 | 1 | 1 | 1 | 1 | 1 | 0 | 0 | 1 | 1 | 1 | 1 | 0 | 1 | 1   | 3 |   |   |
| 102   | 113 | 3  | 10 | 7.80 - 8.14   | 20%               | 28% | 46% | 49%  | 50%   | 18%         | 24% | 39% | 50%  | 49%   | 12%                | 20% | 30% | 43%  | 50%   | 1 | 1 | 0 | 1 | 1 | 1 | 1 | 1 | 0 | 2 | 0 | 0 | 0 | 1 | 1   | 1 |   |   |
| 103   | 111 | 2  | 7  | 5.85 - 6.19   | 27%               | 67% | 85% | 84%  | 87%   | 23%         | 61% | 84% | 86%  | 88%   | 21%                | 53% | 80% | 81%  | 84%   | 1 | 0 | 1 | 2 | 2 | 2 | 1 | 0 | 2 | 1 | 1 | 1 | 1 | 1 | 2   | 7 |   |   |
| 103   | 113 | 2  | 9  | 4.04 - 4.21   | 51%               | 57% | 58% | 57%  | 58%   | 48%         | 58% | 58% | 58%  | 58%   | 45%                | 54% | 56% | 55%  | 57%   | 2 | 2 | 1 | 1 | 1 | 1 | 1 | 2 | 0 | 1 | 1 | 1 | 1 | 1 | 1   | 2 | 5 |   |
| 103   | 113 | 3  | 9  | 4.04 - 4.26   | 52%               | 59% | 59% | 58%  | 59%   | 49%         | 59% | 59% | 59%  | 60%   | 46%                | 55% | 57% | 56%  | 58%   | 2 | 2 | 1 | 1 | 1 | 1 | 1 | 2 | 1 | 1 | 1 | 1 | 1 | 1 | 1   | 1 | 4 |   |
| 103   | 144 | 5  | 33 | 6.69 - 6.77   | 38%               | 41% | 41% | 39%  | 41%   | 40%         | 45% | 45% | 45%  | 45%   | 36%                | 40% | 41% | 40%  | 42%   | 2 | 2 | 1 | 1 | 1 | 1 | 1 | 1 | 1 | 1 | 1 | 1 | 1 | 1 | 1   | 1 | 4 |   |
| 103   | 144 | 6  | 33 | 6.69 - 7.04   | 38%               | 41% | 40% | 39%  | 40%   | 40%         | 45% | 44% | 44%  | 44%   | 36%                | 40% | 41% | 40%  | 42%   | 2 | 2 | 1 | 0 | 1 | 1 | 1 | 1 | 1 | 1 | 1 | 1 | 1 | 1 | 1   | 1 | 4 |   |
| 103   | 146 | 6  | 35 | 6.67 - 6.81   | 34%               | 37% | 37% | 36%  | 37%   | 37%         | 42% | 41% | 41%  | 41%   | 33%                | 37% | 38% | 37%  | 39%   | 2 | 2 | 1 | 1 | 1 | 1 | 1 | 1 | 0 | 1 | 1 | 1 | 1 | 1 | 1   | 1 | 4 |   |
| 104   | 113 | 2  | 8  | 4.03 - 4.21   | 54%               | 61% | 61% | 60%  | 62%   | 50%         | 61% | 61% | 61%  | 61%   | 48%                | 58% | 59% | 58%  | 60%   | 2 | 2 | 1 | 1 | 1 | 1 | 1 | 2 | 1 | 2 | 1 | 1 | 1 | 1 | 1   | 1 | 5 |   |
| 104   | 144 | 5  | 32 | 6.54 - 6.76   | 37%               | 40% | 40% | 39%  | 40%   | 40%         | 45% | 45% | 45%  | 45%   | 35%                | 39% | 40% | 39%  | 41%   | 2 | 2 | 0 | 1 | 0 | 1 | 1 | 1 | 1 | 1 | 1 | 1 | 1 | 1 | 1   | 1 | 4 |   |
| 105   | 113 | 2  | 7  | 4.03 - 4.21   | 59%               | 67% | 68% | 66%  | 68%   | 56%         | 68% | 68% | 68%  | 69%   | 53%                | 63% | 65% | 64%  | 66%   | 2 | 2 | 1 | 1 | 1 | 1 | 1 | 2 | 1 | 1 | 1 | 1 | 1 | 1 | 1   | 1 | 2 | 5 |
| 114   | 143 | 4  | 21 | 6.01 - 6.30   | 43%               | 45% | 46% | 45%  | 46%   | 46%         | 50% | 50% | 50%  | 50%   | 41%                | 44% | 45% | 45%  | 47%   | 2 | 2 | 1 | 0 | 0 | 0 | 1 | 1 | 1 | 1 | 0 | 1 | 2 | 2 | 0   | 1 | 4 |   |
| 114   | 144 | 3  | 22 | 6.91 - 6.99   | 41%               | 44% | 44% | 42%  | 44%   | 44%         | 48% | 48% | 48%  | 48%   | 38%                | 42% | 43% | 43%  | 45%   | 2 | 2 | 1 | 1 | 1 | 1 | 1 | 1 | 1 | 1 | 1 | 1 | 1 | 1 | 1   | 1 | 4 |   |
| 114   | 144 | 5  | 22 | 6.86 - 7.02   | 42%               | 44% | 44% | 43%  | 44%   | 44%         | 48% | 48% | 47%  | 48%   | 39%                | 43% | 44% | 43%  | 45%   | 2 | 2 | 0 | 0 | 1 | 1 | 1 | 1 | 1 | 1 | 1 | 1 | 1 | 1 | 1   | 1 | 4 |   |
| 150   | 195 | 6  | 44 | 4.96 - 5.62   | 47%               | 58% | 58% | 58%  | 60%   | 36%         | 59% | 59% | 60%  | 60%   | 14%                | 24% | 50% | 58%  | 60%   | 0 | 1 | 0 | 0 | 1 | 1 | 1 | 1 | 1 | 1 | 1 | 1 | 1 | 1 | 1   | 1 | 4 |   |
| 179   | 195 | 4  | 15 | 3.96 - 4.18   | 41%               | 50% | 50% | 49%  | 51%   | 40%         | 52% | 51% | 51%  | 52%   | 27%                | 34% | 45% | 48%  | 50%   | 1 | 2 | 1 | 1 | 1 | 1 | 1 | 2 | 1 | 1 | 1 | 1 | 1 | 1 | 1   | 1 | 4 |   |

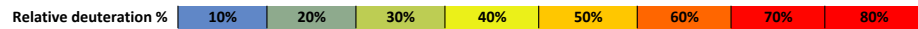



Fig. S6

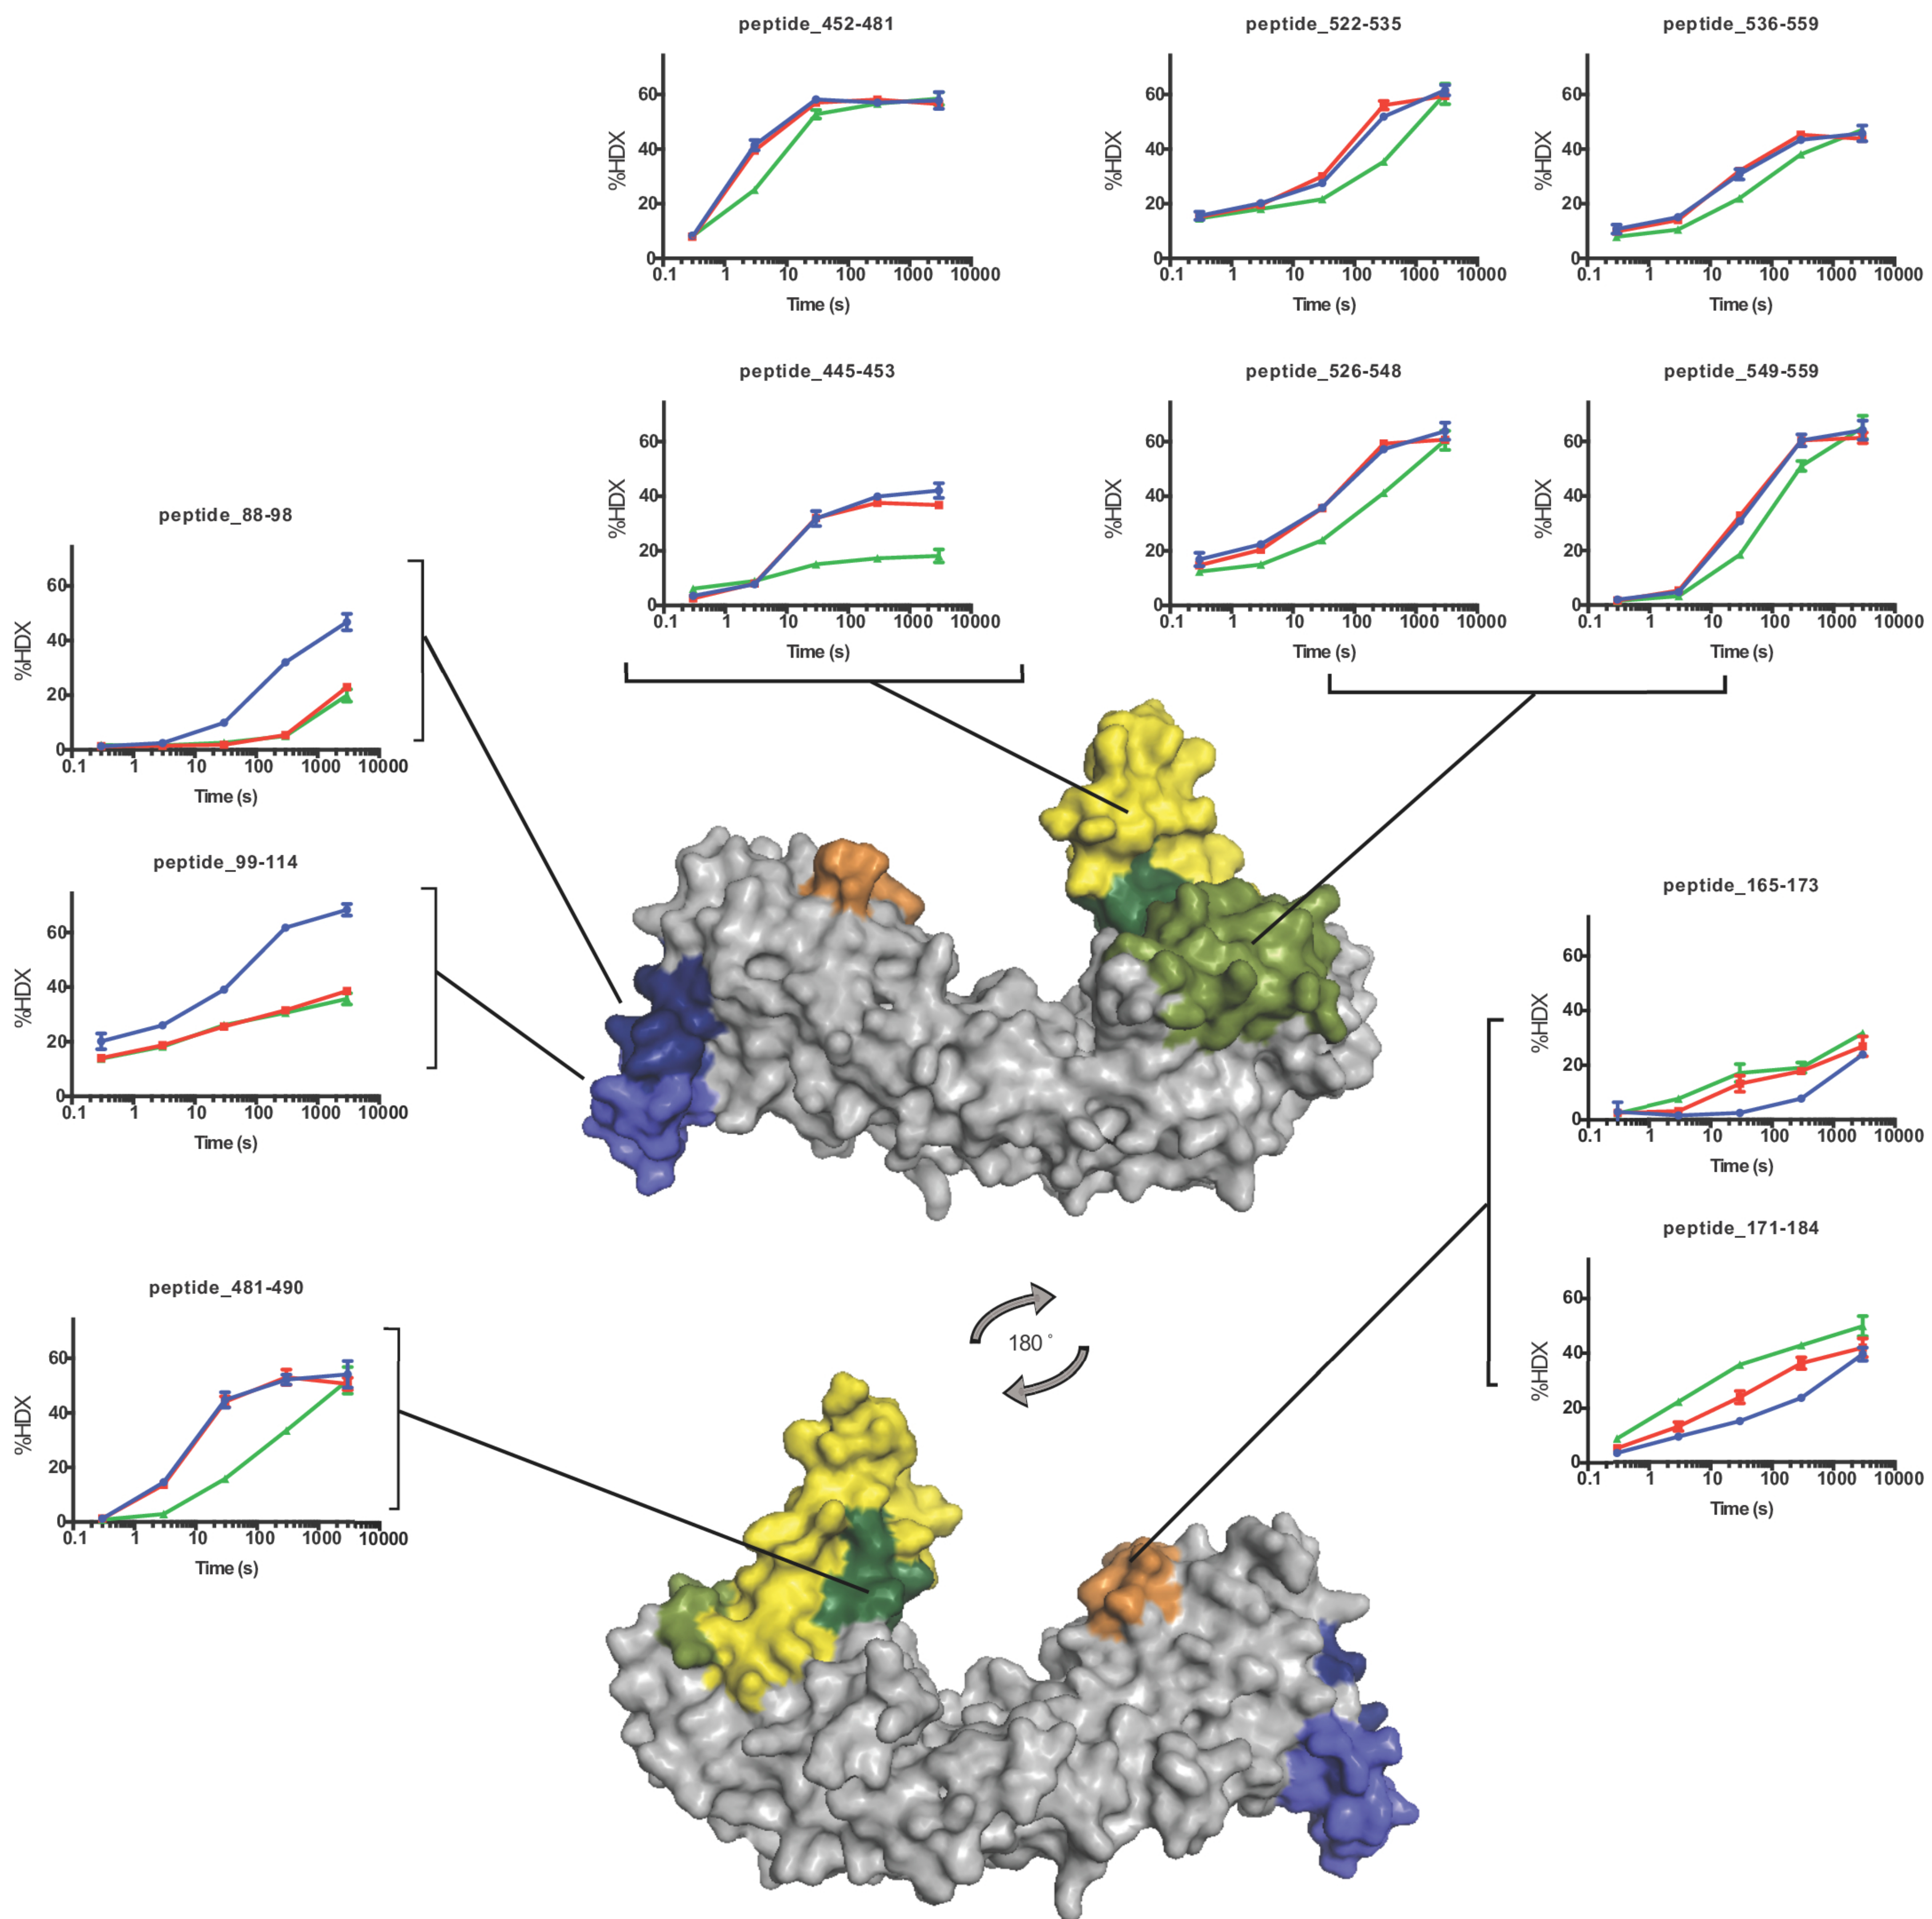



Fig. S7

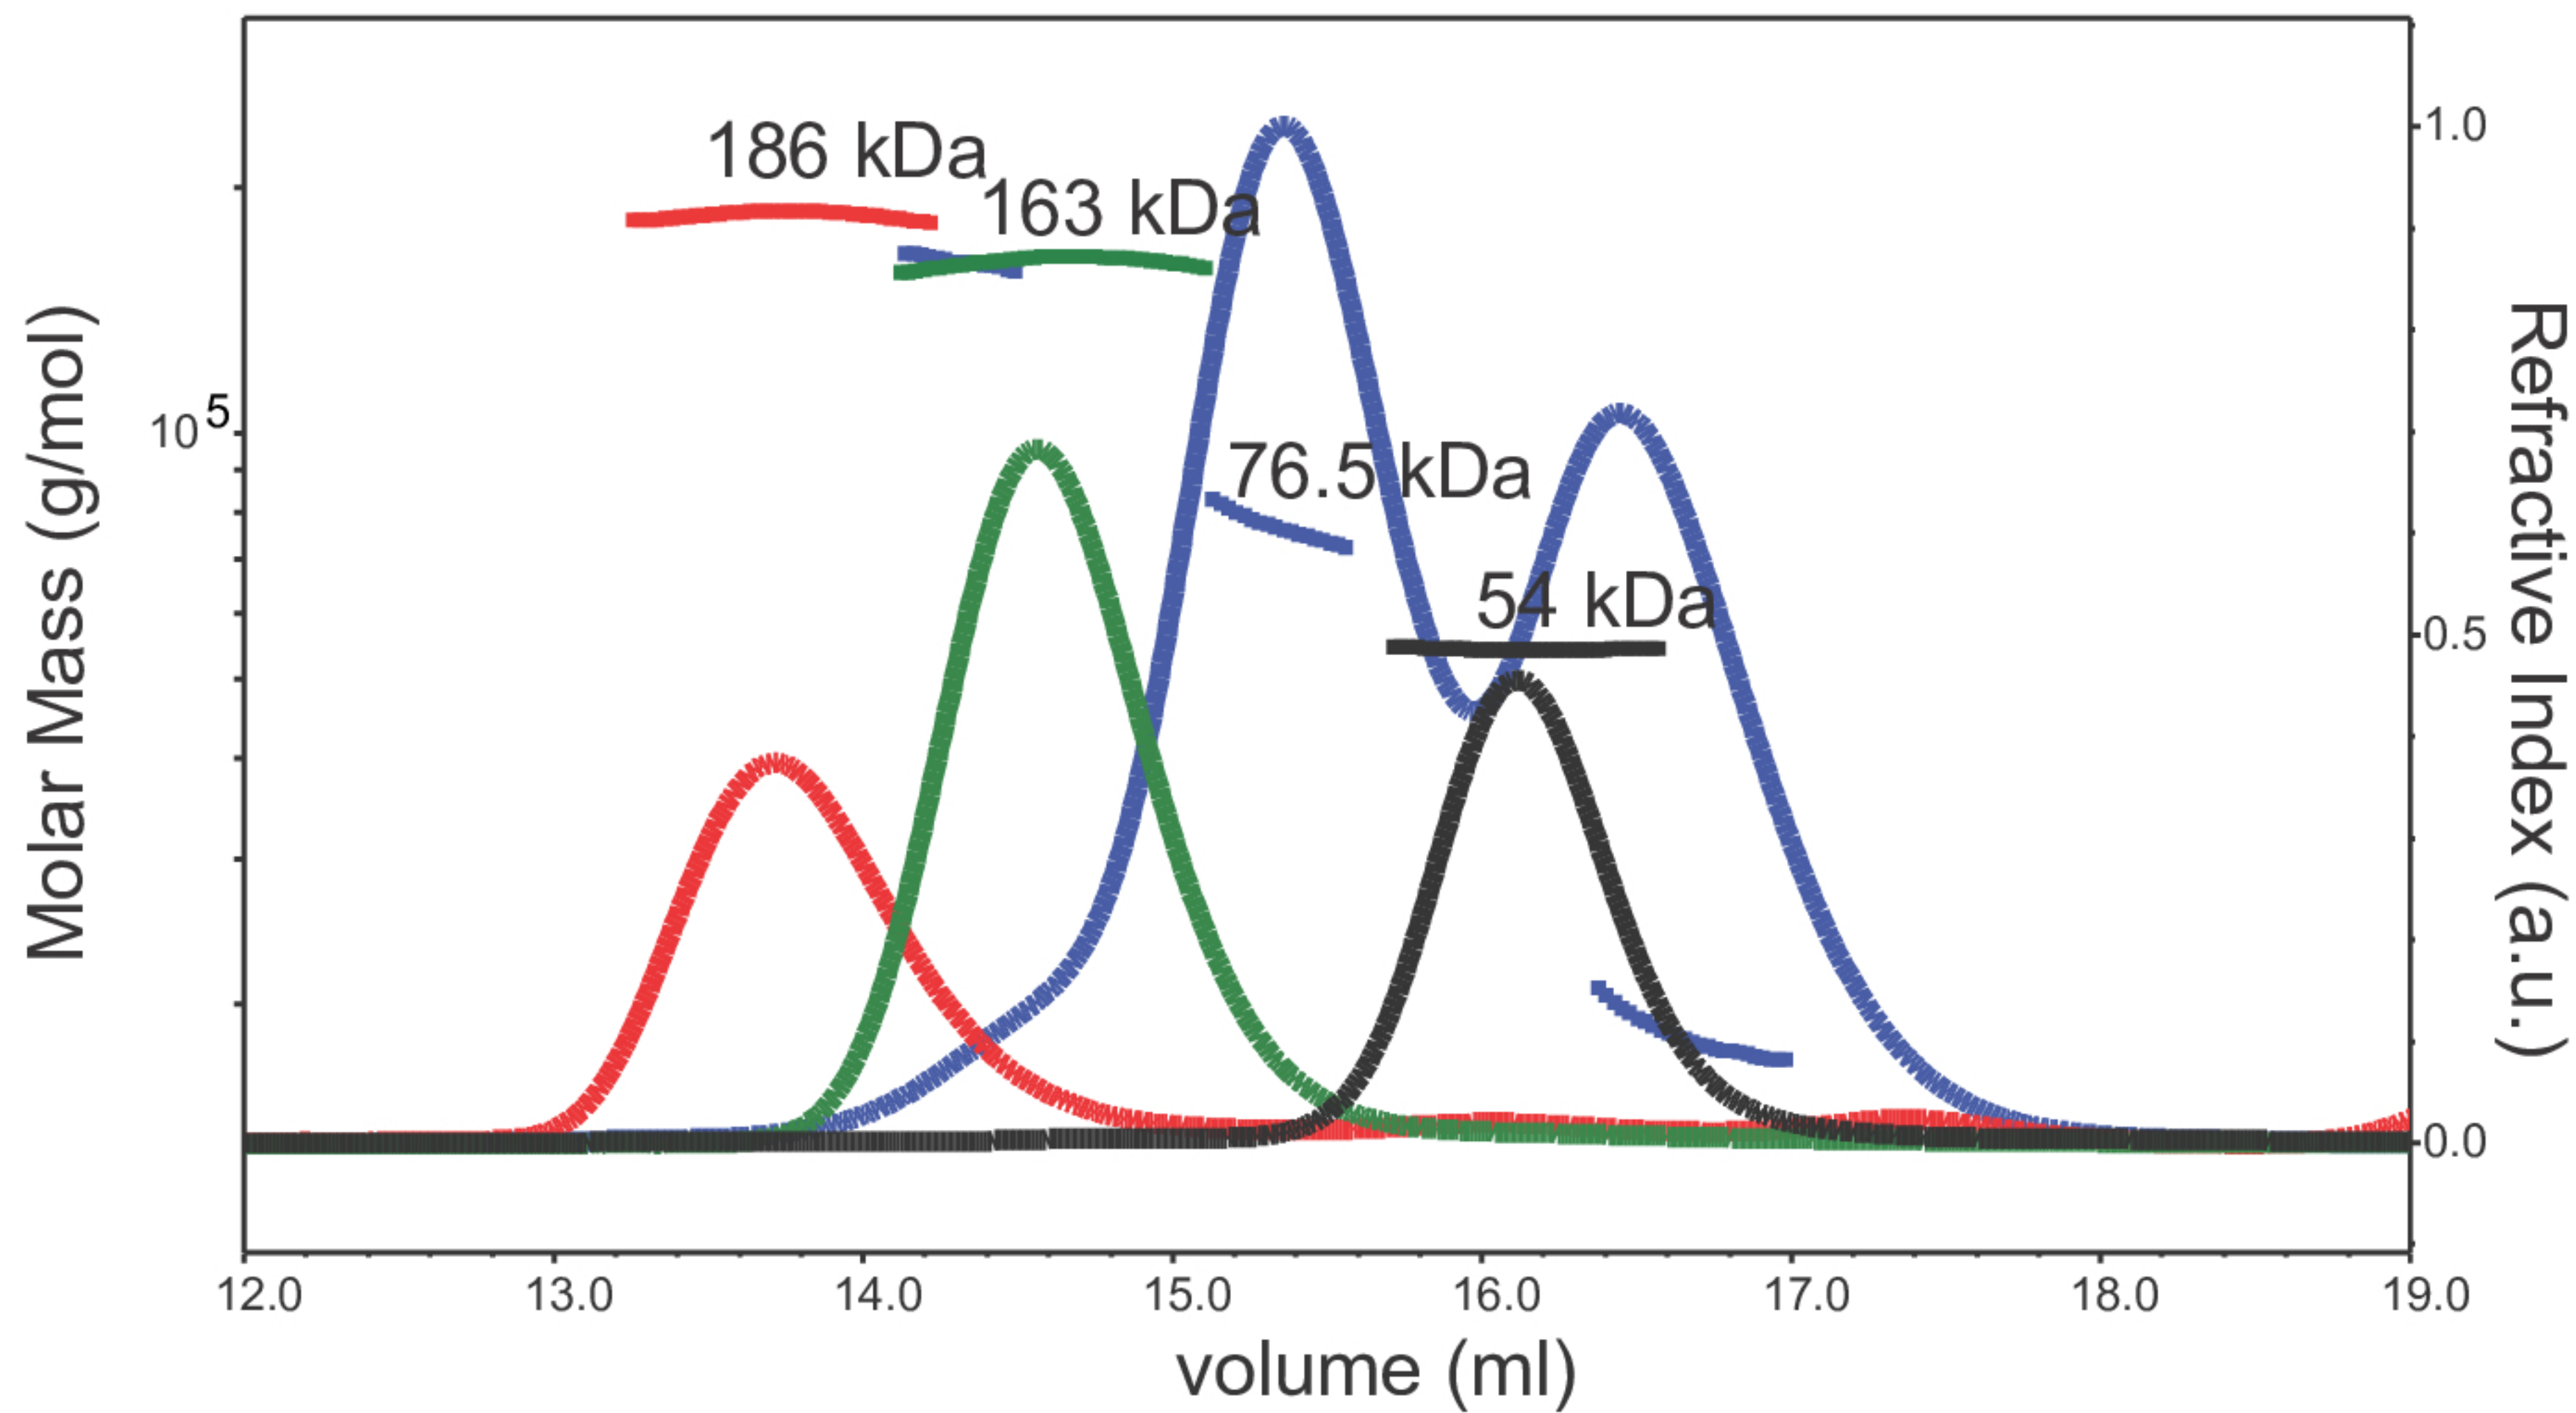

Fig. S8

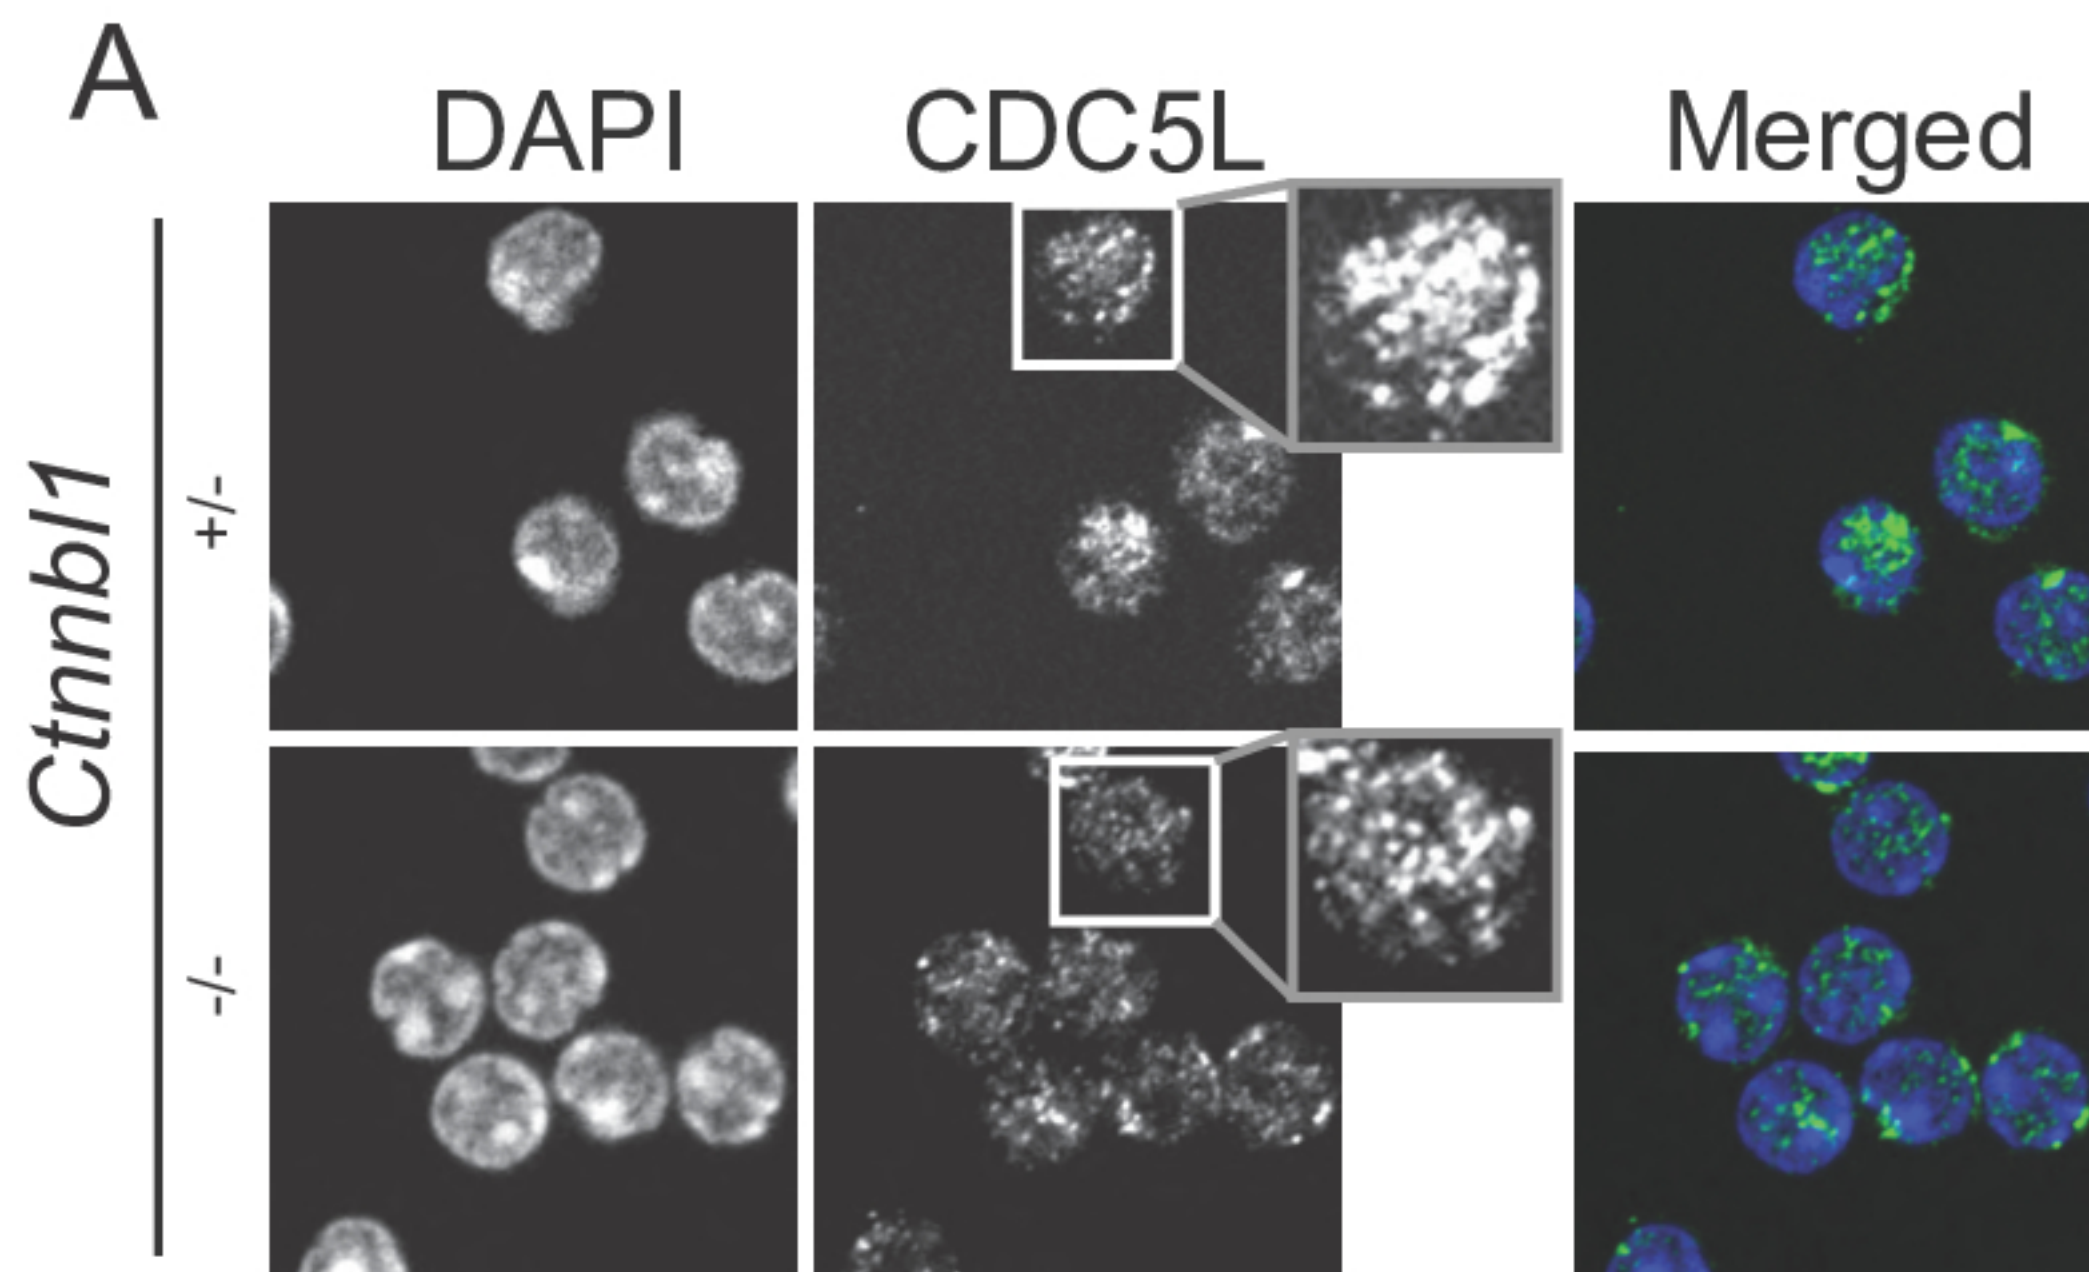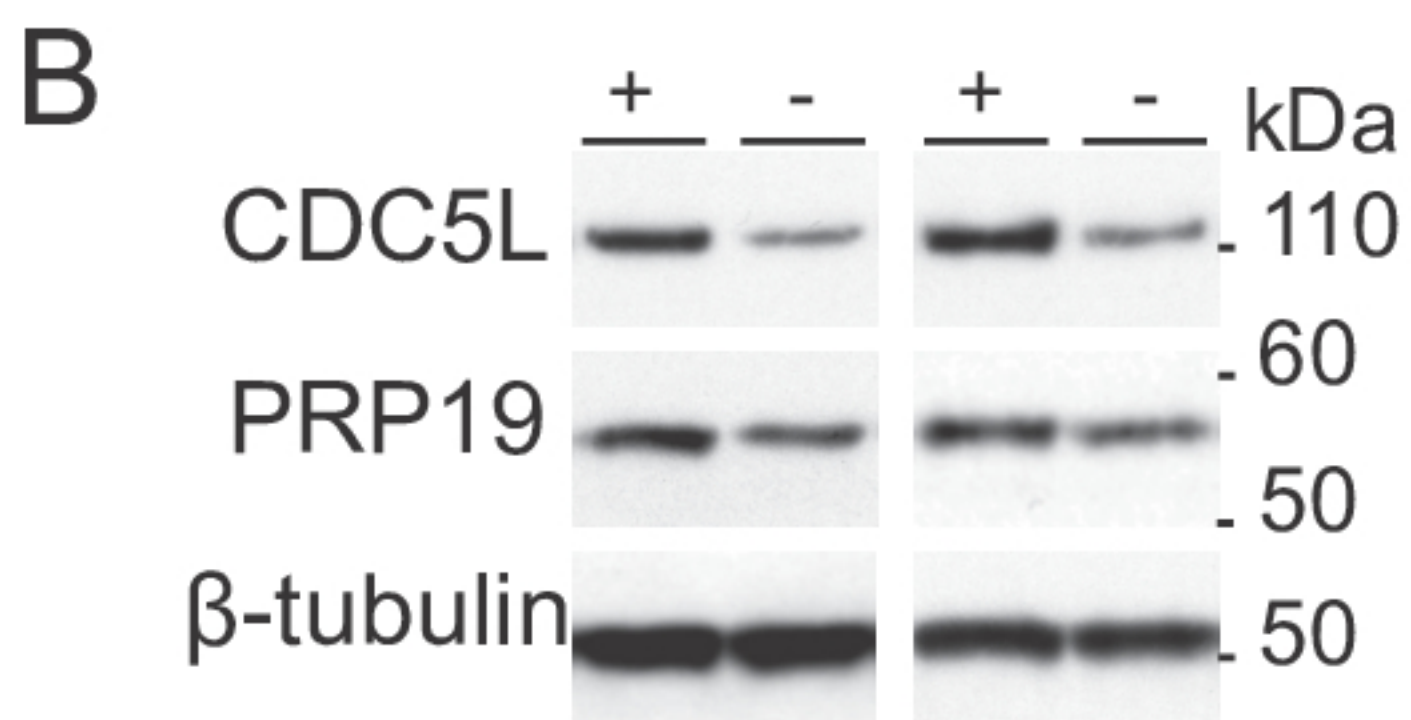



Fig. S9

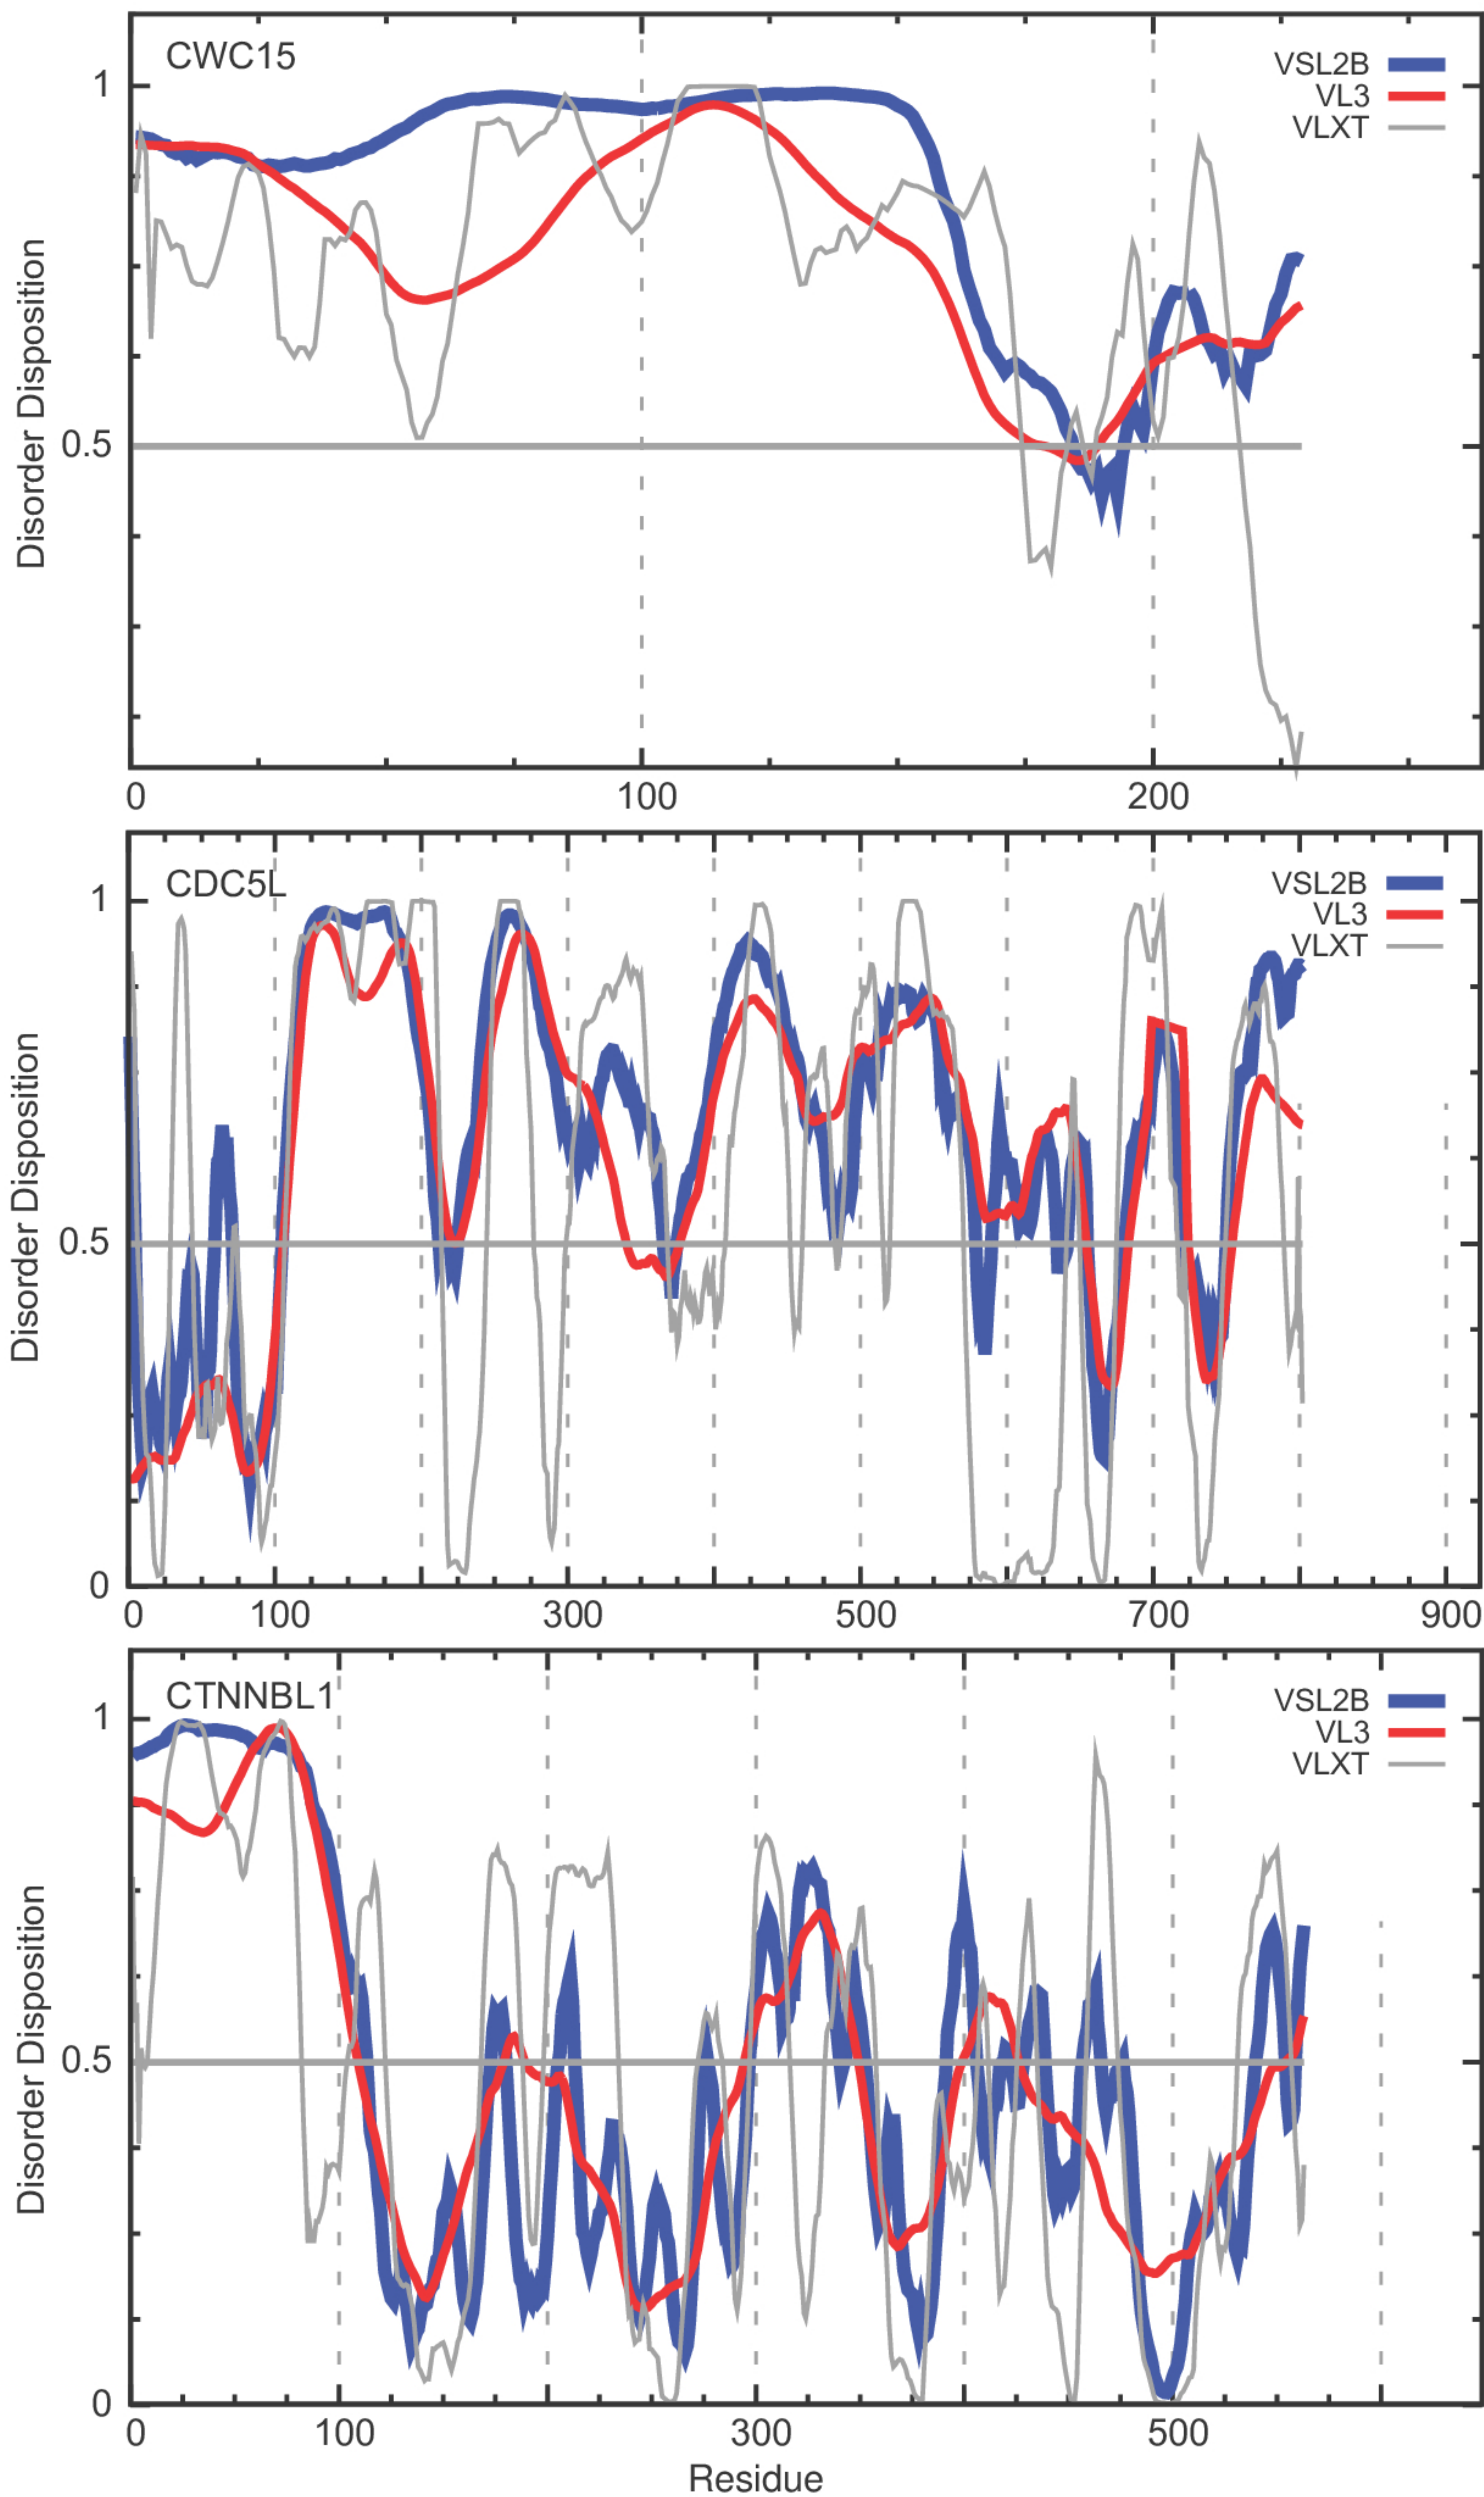

Supplement: supp_gkv643_nar-01372-a-2015-File009.pdf [file supp_gkv643_nar-01372-a-2015-File009.pdf]
